# Supplementary material for: The exceptional stem cell system of Macrostomum lignano: Screening for gene expression and studying cell proliferation by hydroxyurea treatment and irradiation
Source: PubMed Central journal article supplement (PMC1828727; doi:10.1186/1742-9994-4-9), 2007-03-09
Supplement: 1742-9994-4-9-S1.pdf [file 1742-9994-4-9-S1.pdf]

**Additional file 1:**

Selected genes for pilot in situ screen. ANGU numbers according to EST-IDs from *M. lignano* EST project (<http://macest.biology.ucla.edu/macest/>)

1. ANGU570 membrane-type frizzled related protein; Receptors
2. ANGU781 chromosome/nuclear structure Histone H3, family 3a
3. ANGU879 protein phosphatases Atg05580
4. ANGU919 RNA binding ELAV-like 1
5. ANGU1007 ribosomal components 40S ribosomal protein S3
6. ANGU1040 translation elongation factor 1alpha
7. ANGU1103 microtubules beta tubulin
8. ANGU1138 Transcription factor Wolf-hirschhorn syndrome candidate 1
9. ANGU1141 apoptosis TSARG2
10. ANGU1217 bicaudal
11. ANGU1293 HSP70
12. ANGU1314 TOL-1/takeout
13. ANGU1679 GABA
14. ANGU1698 protein phosphatases Ser/Thr 2A
15. ANGU1731 microtubules eml2 protein
16. ANGU1740 chaperonin
17. ANGU1810 microtubules tub-1
18. ANGU1835 RNA binding Ribonuclear protein 97D
19. ANGU1858 8-hydroxy-guanine glycosylase DNA repair
20. ANGU1901 hormone/GF/temptin
21. ANGU1907 Transcription factor zink protein 600
22. ANGU1911 translational elongation factor 1alpha
23. ANGU1931 post-translational modification
24. ANGU1938 RNA processing similar to DEAD
25. ANGU1972 endocytic receptor Endo180
26. ANGU2050 SFRP-2
27. ANGU2138 cyclophilin
28. ANGU2156 ras-like
29. ANGU2157 hormone/GF takeout
30. ANGU2260 protein kinase B - raf
31. ANGU2261 Transcription factor zink finger protein
32. ANGU2295 STAT2
33. ANGU2378 protein kinase adenylate kinase isoenzyme-2
34. ANGU2434 Golgi unknown
35. ANGU2700 Tetraspanin 66E; Adhesion
36. ANGU2717 Transcription factor ETS DNA binding protein Yan
37. ANGU2734 Transcription factor Fank-1
38. ANGU2738 peptidylprolyl isomerase; Post-Translational Modification
39. ANGU2747 similar to armadillo-repeat containing...
40. ANGU2750 Receptors CG2839
41. ANGU2757 stress response: alcohol dehydrogenase class III
42. ANGU2804 translation factor novel protein similar to...
43. ANGU2833 Thick/thin filaments A60607 tropomyosin-fluke
44. ANGU2876 cyclin B1
45. ANGU2876 cyclin B1
46. ANGU2887 translation elongation factor EF1gamma
47. ANGU2903 microfilaments cofilin like protein
48. ANGU2904 transcription factor similar to SOH1

|      |          |                                                         |
|------|----------|---------------------------------------------------------|
| 49.  | ANGU2936 | membrane protein, induced TNF factor                    |
| 50.  | ANGU3044 | xolloid                                                 |
| 51.  | ANGU3103 | arginine kinase                                         |
| 52.  | ANGU3143 | transcription factor FLJ40321 protein                   |
| 53.  | ANGU3164 | vertebrates RIKEN cDNA                                  |
| 54.  | ANGU3215 | degradation cathepsin L-like cystein proteinase A       |
| 55.  | ANGU3256 | vasa                                                    |
| 56.  | ANGU3332 | protein kinase casein kinase 2 beta                     |
| 57.  | ANGU3379 | transcription factor TAR                                |
| 58.  | ANGU3391 | caspase-3                                               |
| 59.  | ANGU3415 | transcription factor KOW                                |
| 60.  | ANGU3466 | membrane protein SCO-spondin                            |
| 61.  | ANGU3467 | receptor growth hormone inducible transmembrane protein |
| 62.  | ANGU3482 | cell cycle division nuclear distribution gene           |
| 63.  | ANGU3546 | translation factor elongation 4e                        |
| 64.  | ANGU3569 | lamin                                                   |
| 65.  | ANGU3685 | transduktion RACK G protein                             |
| 66.  | ANGU3769 | transcription factor spacial delta                      |
| 67.  | ANGU3791 | receptor GABA-BR1b                                      |
| 68.  | ANGU3815 | protein kinase CK2alpha SU                              |
| 69.  | ANGU3912 | transcription factor FOXj3 protein                      |
| 70.  | ANGU3957 | immunology preS1 binding protein                        |
| 71.  | ANGU4026 | XWnt11                                                  |
| 72.  | ANGU4196 | boule; RNA-binding protein                              |
| 73.  | ANGU4210 | transcription factor Rec                                |
| 74.  | ANGU4277 | DNA supercoiling-factor                                 |
| 75.  | ANGU4381 | ERK5                                                    |
| 76.  | ANGU4510 | groucho                                                 |
| 77.  | ANGU4525 | receptor TLR3                                           |
| 78.  | ANGU4574 | receptor nicotinic acetylcholine receptor               |
| 79.  | ANGU4714 | SIR2-like histone deacetylase                           |
| 80.  | ANGU5083 | Xolloid                                                 |
| 81.  | ANGU5174 | DNA-Topoisomerase                                       |
| 82.  | ANGU5290 | cell cycle division pescadilla homolog1                 |
| 83.  | ANGU5302 | ribosomal components 60S                                |
| 84.  | ANGU5468 | cell cycle division polo like kinase 4                  |
| 85.  | ANGU5731 | stress response heat shock protein 60                   |
| 86.  | ANGU5871 | insulin-like growth factor receptor                     |
| 87.  | ANGU5879 | protein phosphatases Ser/Thr protein phosphatases       |
| 88.  | ANGU5895 | Smad4                                                   |
| 89.  | ANGU5903 | transcription factor CCR4                               |
| 90.  | ANGU6039 | transcription factor zink finger protein 403            |
| 91.  | ANGU6051 | cdc2                                                    |
| 92.  | ANGU6098 | transcription factor paired                             |
| 93.  | ANGU6130 | Notch receptor protein                                  |
| 94.  | ANGU6303 | programmed cell death 6-interacting protein             |
| 95.  | ANGU6519 | transcription factor zinc finger PDZ5                   |
| 96.  | ANGU6547 | transcription factor BTF3                               |
| 97.  | ANGU7183 | tropomyosin 2                                           |
| 98.  | ANGU7189 | transcription factor EGF-response factor 2              |
| 99.  | ANGU7606 | piwi                                                    |
| 100. | PCR      | actin                                                   |
| 101. | PCR      | MCM2                                                    |
