# Supplementary material for: The exceptional stem cell system of Macrostomum lignano: Screening for gene expression and studying cell proliferation by hydroxyurea treatment and irradiation
Source: PubMed Central journal article supplement (PMC1828727; doi:10.1186/1742-9994-4-9), 2007-03-09
Supplement: 1742-9994-4-9-S2.pdf [file 1742-9994-4-9-S2.pdf]

Additional file 2:

Alignment of *macpwi* to the different *piwi* genes characterized in the planarian flatworms

*Schmidtea mediterranea* (Smedwi1 DQ186985, Smedwi2 DQ186986) and *Dugesia japonica* (DjPwi1 AJ865376).

```

*          *          *          *          *          *          *          *          *          *
Macpwi1 : MSQQPHGRCGRARCRSCRPPEVEVSSGASFPAPAPAPAPAPAAAARPAAPPGLSAQAQVAGVPSGDQQNTGRCVGRAVERGCGAAQAGD PGLSERMACLRVVC : 100
Smedwi1 : -----HDSTNVITD : 9
Smedwi2 : -----MEEIPVKVAKLEANGSET : 18
DjPwi1 : -----MEIEILRKNLID : 11

*          *          *          *          *          *          *          *          *          *
Macpwi1 : GEASGRCGLRQKLLFPOLANVDFEGAAQCGSSAFVQVQVHTVVRINTEKDKVCAYQLAADRFPLGLAKPAREKLLM--DAQQVHPVDFVCGGKQV : 197
Smedwi1 : PHLRPGCGGLRQKLLFPOLANVDFEGAAQCGSSAFVQVQVHTVVRINTEKDKVCAYQLAADRFPLGLAKPAREKLLM--DAQQVHPVDFVCGGKQV : 196
Smedwi2 : RQKMGRCGLRQKLLFPOLANVDFEGAAQCGSSAFVQVQVHTVVRINTEKDKVCAYQLAADRFPLGLAKPAREKLLM--DAQQVHPVDFVCGGKQV : 117
DjPwi1 : GRIEPRCGGLRQKLLFPOLANVDFEGAAQCGSSAFVQVQVHTVVRINTEKDKVCAYQLAADRFPLGLAKPAREKLLM--DAQQVHPVDFVCGGKQV : 110

*          *          *          *          *          *          *          *          *          *
Macpwi1 : PLAPAEQVKAFAASIKVSGEVAIPQVGVIEKMPQQLLHLMVWVGRKTSHLNMQVWVGFVYFPDQATLPPQHRVWVVPFMAIPKPSDFPLMLHVDVSHK : 297
Smedwi1 : KQHSDEITENLVKID----VEISITPLTLPKNSSEYTOHINVLNMLQVHLCGRKQVFCGSCGCGGIRE--GFSFQMDNTRIGCGVSTHTRCVW : 294
Smedwi2 : KHGCSQIQFSDHE----KRMTLRDSQIDPEETRYTOHINVLNMLQVHLCGRKQVFCGSCGCGVSPSITDEVFPMNSQPTFTNTRVLCGFGTQLQRCK : 201
DjPwi1 : NITGCSQIKFEITDIE----KQVSLRDSQIDPEETRYTOHINVLNMLQVHLCGRKQVFCGSCGSDVWVGNIGTFTFTNTRVLCGFGTQLQRCK : 207

*          *          *          *          *          *          *          *          *          *
Macpwi1 : IIHMSVQVDMYDMYNRNPGN----FQAAATAPVQGVIVLTPHNKTYRDAEAEWDKRVITETFPYKSTRQSEBISLQVYPAQTQVWVSDSQQIIML : 392
Smedwi1 : EMTASTLTLLELRINRVLNNVSVVDFRQDQDLGCDITKYNKNTYRISDREKDN-----VNDVQLGDKKISLNVYFQRYNVMKNDKQPPFI : 294
Smedwi2 : PTELETLLELRINRVLNNVSVVDFRQDQDLGCDITKYNKNTYRISDREKDN-----VDEKFGMCGRTLSVYFQRYNVMKNDKQPPFI : 307
DjPwi1 : PMLQTLTLLELRINRVLNNVSVVDFRQDQDLGCDITKYNKNTYRISDREKDN-----INETFVHQVRLSVAQVYFQRYNVMKNDKQPPFI : 300

*          *          *          *          *          *          *          *          *          *
Macpwi1 : SKPRFDDLPYTK-----GGPRQAEVNLVDFEPCITLTDENRADRMDVQVQVQVATFRIDVSTCCCKLVWVASTHAQNRQCVLGFDFLVA : 479
Smedwi1 : SVVPSVDFVYTK-----TENPFCQITVQSSVPEPCITLTDENRADRMDVQVQVQVATFRIDVSTCCCKLVWVASTHAQNRQCVLGFDFLVA : 485
Smedwi2 : TVEVPMVREKDEKVEVKEKRAEPEKQNTNMLDEKCEVCGSDQKSNMLDQVQVQVQVATFRIDVSTCCCKLVWVASTHAQNRQCVLGFDFLVA : 407
DjPwi1 : TVEVPMVREKDEKVEVKEKRAEPEKQNTNMLDEKCEVCGSDQKSNMLDQVQVQVQVATFRIDVSTCCCKLVWVASTHAQNRQCVLGFDFLVA : 393

*          *          *          *          *          *          *          *          *          *
Macpwi1 : APNAVATAPQALAEETQHTKPIRVDPERADQNALKNGCHFQVNCKNVIVVYSQDQEAALDFQCKLSRASQVLSMSFGFPYLAVAQDQDLVWKTI : 579
Smedwi1 : EKOITLTPRQALAEETQHTKPIRVDPERADQNALKNGCHFQVNCKNVIVVYSQDQEAALDFQCKLSRASQVLSMSFGFPYLAVAQDQDLVWKTI : 579
Smedwi2 : DNRDLRTPRQALAEETQHTKPIRVDPERADQNALKNGCHFQVNCKNVIVVYSQDQEAALDFQCKLSRASQVLSMSFGFPYLAVAQDQDLVWKTI : 506
DjPwi1 : DNTLTPRQALAEETQHTKPIRVDPERADQNALKNGCHFQVNCKNVIVVYSQDQEAALDFQCKLSRASQVLSMSFGFPYLAVAQDQDLVWKTI : 492

*          *          *          *          *          *          *          *          *          *
Macpwi1 : EENIDQCGLDVLFCLLSNRQVYDSIKRLCYVNRKVPVPSQCQLIKR--IIRNPAKVMSEATVALRSCSLQDVAVAVSPHPRHTVHVGCDTHGRQGVSV : 677
Smedwi1 : IY--VSKVMVLRVPPD---KTYARVQVDFSTGLLTQCVTTRNGCNDRDPRKRTADRSVNHSSSLQDQVGINLQVLAHTVHVGCDTHGRQGVSV : 580
Smedwi2 : AASGSCGAKRLVLRVPPD---RYVAVVDFSTGLLTQCVTTRNGCNDRDPRKRVSSSTVYHQLIARFQDPTVIEKRLHTVHVGCDTHGRQGVSV : 603
DjPwi1 : HSGSCGAKRLVLRVPPD---RYVAVVDFSTGLLTQCVTTRNGCNDRDPRKRVSSSTVYHQLIARFQDPTVIEKRLHTVHVGCDTHGRQGVSV : 589

*          *          *          *          *          *          *          *          *          *
Macpwi1 : QVYFSDLEFQVYFSSYPIVKGCAELNENLEVEGQALQRREKNGDTEPILNLDGCVGDSQAEVYVNSLLEQLQSLKYLGERMSSLCFKALVYK : 777
Smedwi1 : QAVFSDLEFQVYFSSYPIVKGCAELNENLEVEGQALQRREKNGDTEPILNLDGCVGDSQAEVYVNSLLEQLQSLKYLGERMSSLCFKALVYK : 777
Smedwi2 : QAVFSDLEFQVYFSSYPIVKGCAELNENLEVEGQALQRREKNGDTEPILNLDGCVGDSQAEVYVNSLLEQLQSLKYLGERMSSLCFKALVYK : 703
DjPwi1 : HAVFSDLEFQVYFSSYPIVKGCAELNENLEVEGQALQRREKNGDTEPILNLDGCVGDSQAEVYVNSLLEQLQSLKYLGERMSSLCFKALVYK : 688

*          *          *          *          *          *          *          *          *          *
Macpwi1 : VLUSSEMPKQSQLNVAEFTLDDVTHPNEVDFLYSYVYVQVSTVTPHMYMLVNDALV-----DDQVQLVPLTHLYFNUGCTIRVDFP : 869
Smedwi1 : KRLTSVDFVNDAA--HNPQCTVUDKRIENPNTFFLYSQRVSTVSTVTPHMYMLVNDALV-----DDQVQLVPLTHLYFNUGCTIRVDFP : 774
Smedwi2 : KRLVCTLMDNRK--HNPQCTVUDKRIENPNTFFLYSQRVSTVSTVTPHMYMLVNDALV-----DDQVQLVPLTHLYFNUGCTIRVDFP : 799
DjPwi1 : KRLVCTLMDNRK--HNPQCTVUDKRIENPNTFFLYSQRVSTVSTVTPHMYMLVNDALV-----DDQVQLVPLTHLYFNUGCTIRVDFP : 784

*          *          *          *          *          *          *          *          *          *
Macpwi1 : VYAHLEALVLCRTRGCVTPAHMDITRERLFFL : 899
Smedwi1 : VYAHLEALVLCRTRGCVTPAHMDITRERLFFL : 808
Smedwi2 : VYAHLEALVLCRTRGCVTPAHMDITRERLFFL : 833
DjPwi1 : VYAHLEALVLCRTRGCVTPAHMDITRERLFFL : 818

```
