# Supplementary material for: The exceptional stem cell system of Macrostomum lignano: Screening for gene expression and studying cell proliferation by hydroxyurea treatment and irradiation
Source: PubMed Central journal article supplement (PMC1828727; doi:10.1186/1742-9994-4-9), 2007-03-09
Supplement: 1742-9994-4-9-S3.pdf [file 1742-9994-4-9-S3.pdf]

Additional file 3: Subtraction library BLAST results top 10. Engine: NCBI. Database: NR.

| Clone               | bp  | ID                  | Homology                                                                                                                                                                                                | Score | E value  | category            |
|---------------------|-----|---------------------|---------------------------------------------------------------------------------------------------------------------------------------------------------------------------------------------------------|-------|----------|---------------------|
| 1 Zoo I D05.36.07   | 579 | emb CAF01426.2      | protein kinase A catalytic subunit 2 [Aspergillus fumigatus]                                                                                                                                            | 68    | 1,00E-10 | RNA binding         |
|                     |     | gb AA067395.1       | mitogen- and stress-activated protein kinase-2 [Homo sapiens]                                                                                                                                           | 62    | 6,00E-09 |                     |
|                     |     | ref NP_003933.1     | ribosomal protein S6 kinase, 90kDa, polypeptide 4; ribosomal protein kinase B; mitogen- and stress-activated protein kinase 2; ribosomal protein S6 kinase, 90kD, polypeptide 4 [Homo sapiens] sp O7567 | 62    | 6,00E-09 |                     |
|                     |     | gb AAH47896.1       | RPS6KA4 protein [Homo sapiens]                                                                                                                                                                          | 62    | 6,00E-09 |                     |
|                     |     | ref XP_408854.1     | hypothetical protein AN4717.2 [Aspergillus nidulans FGSC A4] gb EAA60759.1  hypothetical protein AN4717.2 [Aspergillus nidulans FGSC A4]                                                                | 62    | 7,00E-09 |                     |
|                     |     | emb CAG13167.1      | unnamed protein product [Tetraodon nigroviridis]                                                                                                                                                        | 62    | 7,00E-09 |                     |
|                     |     | gb AAF15553.1       | Rsk-2 [Xenopus laevis]                                                                                                                                                                                  | 61    | 1,00E-08 |                     |
|                     |     | gb AAH12964.1       | Ribosomal protein S6 kinase, polypeptide 4 [Mus musculus]                                                                                                                                               | 61    | 2,00E-08 |                     |
|                     |     | gb AAC69577.1       | ribosome S6 protein kinase [Homo sapiens]                                                                                                                                                               | 61    | 2,00E-08 |                     |
|                     |     | ref NP_004746.2     | ribosomal protein S6 kinase, 90kDa, polypeptide 5 isoform a; mitogen- and stress-activated protein kinase 1; ribosomal protein S6 kinase, 90kD, polypeptide 5 [Homo sapiens] sp O75582 K6A5_HUMAN f     | 61    | 2,00E-08 |                     |
| 1 Zoo I F11.86.11   | 445 | gb AA067395.1       | mitogen- and stress-activated protein kinase-2 [Homo sapiens]                                                                                                                                           | 46    | 2,00E-04 | RNA binding         |
|                     |     | gb AAH47896.1       | RPS6KA4 protein [Homo sapiens]                                                                                                                                                                          | 46    | 2,00E-04 |                     |
|                     |     | ref NP_003933.1     | ribosomal protein S6 kinase, 90kDa, polypeptide 4; ribosomal protein kinase B; mitogen- and stress-activated protein kinase 2; ribosomal protein S6 kinase, 90kD, polypeptide 4 [Homo sapiens] sp O7567 | 46    | 2,00E-04 |                     |
|                     |     | emb CAA73554.1      | Serine/Threonine protein kinase [Sycon raphanus]                                                                                                                                                        | 45    | 2,00E-04 |                     |
|                     |     | emb CAA66181.1      | G protein-coupled receptor kinase GRK4B [Rattus norvegicus]                                                                                                                                             | 45    | 3,00E-04 |                     |
|                     |     | ref NP_075217.1     | G protein-coupled receptor kinase 2, groucho gene related [Rattus norvegicus] sp P70507 GRK4_RAT G protein-coupled receptor kinase 4 (G protein-coupled receptor kinase GRK4) emb CAA66180.1  G         | 45    | 3,00E-04 |                     |
|                     |     | gb AAH12964.1       | Ribosomal protein S6 kinase, polypeptide 4 [Mus musculus]                                                                                                                                               | 45    | 4,00E-04 |                     |
|                     |     | ref NP_062370.1     | G protein-coupled receptor kinase 2, groucho gene related; G protein-coupled receptor kinase 4 [Mus musculus] sp O70291 GRK4_MOUSE G protein-coupled receptor kinase 4 (G protein-coupled recept        | 44    | 5,00E-04 |                     |
|                     |     | gb AA068709.2       | Protein kinase c protein 2, isoform c [Caenorhabditis elegans]                                                                                                                                          | 44    | 5,00E-04 |                     |
|                     |     | pir IT15903         | protein kinase C homolog - Caenorhabditis elegans                                                                                                                                                       | 44    | 5,00E-04 |                     |
| 1 Zoo II F02.110.12 | 326 | emb CAF68872.1      | Hypothetical protein CBG12250 [Caenorhabditis briggsae]                                                                                                                                                 | 120   | 7,00E-27 | RNA binding         |
|                     |     | ref NP_194751.1     | small nuclear ribonucleoprotein F, putative / snRNP-F, putative / Sm protein F, putative [Arabidopsis thaliana] sp Q9SUM2 RUXF_ARATH Probable small nuclear ribonucleoprotein F (snRNP-F) (Sm prote     | 119   | 1,00E-26 |                     |
|                     |     | ref XP_312266.1     | ENSANGP00000002801 [Anopheles gambiae] gb EAA07677.2  ENSANGP00000002801 [Anopheles gambiae str. PEST]                                                                                                  | 118   | 3,00E-26 |                     |
|                     |     | ref XP_357414.1     | similar to SNRPF protein [Mus musculus]                                                                                                                                                                 | 117   | 4,00E-26 |                     |
|                     |     | emb CAG04169.1      | unnamed protein product [Tetraodon nigroviridis]                                                                                                                                                        | 117   | 7,00E-26 |                     |
|                     |     | db BAD27986.1       | putative small nuclear ribonucleoprotein polypeptide F [Oryza sativa (japonica cultivar-group)]                                                                                                         | 117   | 7,00E-26 |                     |
|                     |     | ref XP_345815.1     | similar to Small nuclear ribonucleoprotein F (snRNP-F) (Sm protein F) (Sm-F) (SmF) [Rattus norvegicus]                                                                                                  | 116   | 1,00E-25 |                     |
|                     |     | gb AAH66015.1       | Unknown (protein for IMAGE:5715059) [Mus musculus]                                                                                                                                                      | 116   | 1,00E-25 |                     |
|                     |     | ref NP_003086.1     | small nuclear ribonucleoprotein polypeptide F [Homo sapiens] sp Q15356 RUXF_HUMAN Small nuclear ribonucleoprotein F (snRNP-F) (Sm protein F) (Sm-F) (SmF) pir S55053 Sm protein F - human em            | 116   | 1,00E-25 |                     |
|                     |     | emb CAG33032.1      | SNRPF [Homo sapiens]                                                                                                                                                                                    | 116   | 1,00E-25 |                     |
| 1 Zoo I G01.7.13    | 557 | ref NP_172940.1     | expressed protein [Arabidopsis thaliana] gb AAF79235.1  F10B6.27 [Arabidopsis thaliana] gb AAL62389.1  unknown protein [Arabidopsis thaliana] gb AAM48020.1  unknown protein [Arabidopsis thaliana]     | 64    | 1,00E-10 | cell cycle/division |
|                     |     | ref NP_680337.2     | expressed protein [Arabidopsis thaliana]                                                                                                                                                                | 62    | 8,00E-10 |                     |
|                     |     | db BAD29572.1       | putative ORFX [Oryza sativa (japonica cultivar-group)]                                                                                                                                                  | 55    | 2,00E-09 |                     |
|                     |     | gb AAF74286.1       | ORFX [Lycopersicon esculentum] gb AAO12185.1  fw2.2 [Lycopersicon esculentum] gb AAO12186.1  fw2.2 [Lycopersicon esculentum] gb AAO12187.1  fw2.2 [Lycopersicon esculentum] gb AAO12188.1               | 55    | 8,00E-09 |                     |
|                     |     | gb AAO12196.1       | fw2.2 [Lycopersicon pennellii]                                                                                                                                                                          | 55    | 8,00E-09 |                     |
|                     |     | gb AAO12190.1       | fw2.2 [Lycopersicon pimpinellifolium] gb AAO12191.1  fw2.2 [Lycopersicon pimpinellifolium] gb AAO12192.1  fw2.2 [Lycopersicon pimpinellifolium] gb AAO12193.1  fw2.2 [Lycopersicon parviflorum] gb AA   | 55    | 8,00E-09 |                     |
|                     |     | gb AAF74287.1       | ORFX [Lycopersicon pennellii]                                                                                                                                                                           | 55    | 8,00E-09 |                     |
|                     |     | gb AAO12189.1       | fw2.2 [Lycopersicon cheesmanii]                                                                                                                                                                         | 54    | 2,00E-08 |                     |
|                     |     | ref NP_172941.1     | expressed protein [Arabidopsis thaliana] gb AAF79233.1  F10B6.29 [Arabidopsis thaliana] db BAC43448.1  unknown protein [Arabidopsis thaliana] gb AAO64083.1  unknown protein [Arabidopsis thaliana]     | 57    | 2,00E-08 |                     |
|                     |     | gb AAT44867.1       | DUF614 protein [Branchiostoma belcheri tsingtaunense]                                                                                                                                                   | 60    | 3,00E-08 |                     |
| 1 Zoo II G02.111.14 | 442 | emb CAF75015.1      | Hypothetical protein CBG22919 [Caenorhabditis briggsae]                                                                                                                                                 | 57    | 8,00E-08 | cell cycle/division |
|                     |     | ref NP_501992.1     | protein phosphatase family member (4L516) [Caenorhabditis elegans] pir T25259 phosphoprotein phosphatase (EC 3.1.3.16) T25B9.2 [similarity] - Caenorhabditis elegans emb CAA94374.1  Hypothetica        | 57    | 1,00E-07 |                     |
|                     |     | ref NP_502041.1     | predicted CDS, protein phosphatase family member (4L719) [Caenorhabditis elegans] pir T27314 phosphoprotein phosphatase (EC 3.1.3.16) Y69E1A.4 [similarity] - Caenorhabditis elegans emb CAA222         | 57    | 1,00E-07 |                     |
|                     |     | emb CAF74022.1      | Hypothetical protein CBG21670 [Caenorhabditis briggsae]                                                                                                                                                 | 56    | 2,00E-07 |                     |
|                     |     | ref NP_505470.1     | protein phosphatase family member (5K44) [Caenorhabditis elegans] pir T21322 phosphoprotein phosphatase (EC 3.1.3.16) 1 F25B3.4 [similarity] - Caenorhabditis elegans emb CAA94756.1  Hypothetic        | 55    | 2,00E-07 |                     |
|                     |     | ref NP_499229.1     | protein phosphatase family member (3L126) [Caenorhabditis elegans] pir G88572 protein T16G12.7 [imported] - Caenorhabditis elegans emb CAA83616.1  Hypothetical protein T16G12.7 [Caenorhabditis        | 55    | 3,00E-07 |                     |
|                     |     | emb CAF65057.1      | Hypothetical protein CBG09902 [Caenorhabditis briggsae]                                                                                                                                                 | 55    | 3,00E-07 |                     |
|                     |     | sp P11612 PPY_DROME | Serine/threonine protein phosphatase PP-Y pir PAFFY phosphoprotein phosphatase (EC 3.1.3.16) Y - fruit fly (Drosophila melanogaster) emb CAA68808.1  unnamed protein product [Drosophila melanog        | 55    | 4,00E-07 |                     |
|                     |     | ref NP_476689.1     | CG10930-PA [Drosophila melanogaster] gb AAF57771.1  CG10930-PA [Drosophila melanogaster] gb AAL68035.1  AT05565P [Drosophila melanogaster]                                                              | 55    | 4,00E-07 |                     |
|                     |     | emb CAF63788.1      | Hypothetical protein CBG08329 [Caenorhabditis briggsae]                                                                                                                                                 | 54    | 6,00E-07 |                     |
| 1 Zoo I A01.1.01    | 433 | ref NP_014536.1     | cell wall integrity and stress response component 3; Wsc3p [Saccharomyces cerevisiae] sp Q12215 WSC3_YEAST Cell wall integrity and stress response component 3 precursor pir S51892 probable me         | 41    | 0,004    | stress response     |
|                     |     | gb AA02272.1        | mucin [Homo sapiens]                                                                                                                                                                                    | 40    | 0,01     |                     |
|                     |     | ref NP_997126.2     | mucin 19; sublingual apomucin [Mus musculus] gb AAS77382.2  Muc19 precursor [Mus musculus]                                                                                                              | 40    | 0,01     |                     |
|                     |     | ref XP_354871.1     | similar to sublingual apomucin [Mus musculus]                                                                                                                                                           | 40    | 0,01     |                     |
|                     |     | gb AAF13032.1       | intestinal mucin 3 [Homo sapiens]                                                                                                                                                                       | 40    | 0,01     |                     |
|                     |     | ref XP_390611.1     | hypothetical protein FG10435.1 [Gibberella zeae PH-1] gb EAA68209.1  hypothetical protein FG10435.1 [Gibberella zeae PH-1]                                                                              | 40    | 0,01     |                     |
|                     |     | gb AA049800.1       | MUC19 [Mus musculus]                                                                                                                                                                                    | 40    | 0,01     |                     |
|                     |     | gb AAO38851.1       | sublingual apomucin [Mus musculus]                                                                                                                                                                      | 40    | 0,01     |                     |
|                     |     | ref XP_168578.4     | mucin 3B [Homo sapiens]                                                                                                                                                                                 | 39    | 0,022    |                     |
|                     |     | ref XP_374501.1     | similar to intestinal mucin 3 [Homo sapiens]                                                                                                                                                            | 39    | 0,022    |                     |

Additional file 3: Subtraction library BLAST results top 10. Engine: NCBI. Database: NR.

| Clone             | bp  | ID                   | Homology                                                                                                                                                                                              | Score | E value  | category        |
|-------------------|-----|----------------------|-------------------------------------------------------------------------------------------------------------------------------------------------------------------------------------------------------|-------|----------|-----------------|
| 1 Zoo I F03 22 11 | 434 | ref XP_354871.1      | similar to sublingual apomucin [Mus musculus]                                                                                                                                                         | 42    | 0.003    | stress response |
|                   |     | ref NP_997126.2      | mucin 19; sublingual apomucin [Mus musculus] gb AAS77382.2  Muc19 precursor [Mus musculus]                                                                                                            | 42    | 0.003    |                 |
|                   |     | gb AAO38851.1        | sublingual apomucin [Mus musculus]                                                                                                                                                                    | 42    | 0.003    |                 |
|                   |     | gb AAO49800.1        | MUC19 [Mus musculus]                                                                                                                                                                                  | 42    | 0.003    |                 |
|                   |     | emb CAC83675.1       | mucin 5 [Homo sapiens]                                                                                                                                                                                | 41    | 0.006    |                 |
|                   |     | ref NP_014536.1      | cell wall integrity and stress response component 3; Wsc3p [Saccharomyces cerevisiae] sp Q12215 WSC3_YEAST Cell wall integrity and stress response component 3 precursor pir S51892 probable me       | 40    | 0.007    |                 |
|                   |     | ref XP_390611.1      | hypothetical protein FG10435.1 [Gibberella zeae PH-1] gb EAA68209.1  hypothetical protein FG10435.1 [Gibberella zeae PH-1]                                                                            | 40    | 0.013    |                 |
|                   |     | gb AAF13032.1        | intestinal mucin 3 [Homo sapiens]                                                                                                                                                                     | 39    | 0.028    |                 |
|                   |     | pid S53363           | mucin 5AC (clone JER58) - human (fragment) emb CAA84032.1  mucin [Homo sapiens]                                                                                                                       | 39    | 0.028    |                 |
|                   |     | gb AAO2272.1         | mucin [Homo sapiens]                                                                                                                                                                                  | 39    | 0.028    |                 |
| 1 Zoo I F05 38 11 | 581 | gb AAF80601.1        | FMRFamide-gated Na+ channel [Helisoma trivolvis]                                                                                                                                                      | 48    | 1.00E-04 | transduction    |
|                   |     | ref NP_491214.1      | degenerin mec-4 family member (1E341) [Caenorhabditis elegans] sp O01635 DEGY_CAEEL Degenerin-like protein ZK770.1 in chromosome I pir T34468 hypothetical protein ZK770.1 - Caenorhabditis e         | 39    | 0.004    |                 |
|                   |     | sp Q25011 IFANA_HELA | FMRFamide-activated amiloride-sensitive sodium channel (FANACH) pir S68434 FMRFamide-activated sodium channel protein, amiloride-sensitive - brown garden snail emb CAA63084.1  FMRFamide-a           | 43    | 0.005    |                 |
|                   |     | emb CAF66660.1       | Hypothetical protein CBG11997 [Caenorhabditis briggsae]                                                                                                                                               | 39    | 0.006    |                 |
|                   |     | gb AAK20896.1        | FMRFamide-gated and pH-modulated sodium channel [Lymnaea stagnalis]                                                                                                                                   | 40    | 0.03     |                 |
|                   |     | ref XP_321465.1      | ENSANGP00000008568 [Anopheles gambiae] gb EAA00980.1  ENSANGP00000008568 [Anopheles gambiae str. PEST]                                                                                                | 39    | 0.067    |                 |
|                   |     | ref XP_309730.1      | ENSANGP00000012636 [Anopheles gambiae] gb EAA05433.1  ENSANGP00000012636 [Anopheles gambiae str. PEST]                                                                                                | 38    | 0.11     |                 |
|                   |     | ref XP_309733.1      | ENSANGP00000012506 [Anopheles gambiae] gb EAA05551.1  ENSANGP00000012506 [Anopheles gambiae str. PEST]                                                                                                | 37    | 0.2      |                 |
|                   |     | sp Q13263 SCG2_XENL  | Amiloride-sensitive sodium channel gamma-2-subunit (Epithelial Na(+)) channel gamma-2 subunit (Gamma-2 ENAC) (Nonvoltage-gated sodium channel 1 gamma-2 subunit) (SCNEG2) (Gamma-2 NACH               | 37    | 0.25     |                 |
|                   |     | ref XP_309731.1      | ENSANGP00000012533 [Anopheles gambiae] gb EAA05580.1  ENSANGP00000012533 [Anopheles gambiae str. PEST]                                                                                                | 37    | 0.33     |                 |
| 1 Zoo I H02 16 16 | 523 | ref NP_989985.1      | CocoaCrisp [Gallus gallus] gb AAK16497.1  CocoaCrisp [Gallus gallus]                                                                                                                                  | 50    | 3.00E-05 | transduction    |
|                   |     | emb CAF98015.1       | unnamed protein product [Tetraodon nigroviridis]                                                                                                                                                      | 49    | 5.00E-05 |                 |
|                   |     | ref NP_956764.1      | hypothetical protein MGC63636 [Danio rerio] gb AAH55176.1  Hypothetical protein MGC63636 [Danio rerio]                                                                                                | 49    | 6.00E-05 |                 |
|                   |     | dbj BAB55081.1       | unnamed protein product [Homo sapiens]                                                                                                                                                                | 47    | 2.00E-04 |                 |
|                   |     | gb AAQ89150.1        | trypsin inhibitor [Homo sapiens]                                                                                                                                                                      | 47    | 2.00E-04 |                 |
|                   |     | ref NP_113664.1      | hypothetical protein DKFZp434B044 [Homo sapiens] emb CAB66795.1  hypothetical protein [Homo sapiens]                                                                                                  | 47    | 2.00E-04 |                 |
|                   |     | gb AAH63012.1        | Unknown (protein for MGC:74865) [Homo sapiens]                                                                                                                                                        | 45    | 5.00E-04 |                 |
|                   |     | ref XP_237258.2      | similar to CocoaCrisp [Rattus norvegicus]                                                                                                                                                             | 45    | 5.00E-04 |                 |
|                   |     | sp P17326 AT1A_ARTS  | Sodium/potassium-transporting ATPase alpha chain (Sodium pump) (Na+/K+ ATPase) pir J506635 Na+/K+-exchanging ATPase (EC 3.6.3.9) alpha chain (clone alpha-2850) - brine shrimp emb CAA68811           | 45    | 0.001    |                 |
|                   |     | ref NP_113649.1      | CocoaCrisp [Homo sapiens] gb AAG43287.1  putative secretory protein precursor [Homo sapiens] gb AAK16495.1  CocoaCrisp [Homo sapiens] gb AAH20514.1  CocoaCrisp [Homo sapiens] gb AAQ8892             | 45    | 0.001    |                 |
| 1 Zoo I C06 43 06 | 473 | ref XP_390611.1      | hypothetical protein FG10435.1 [Gibberella zeae PH-1] gb EAA68209.1  hypothetical protein FG10435.1 [Gibberella zeae PH-1]                                                                            | 47    | 1.00E-04 | receptors       |
|                   |     | ref XP_331659.1      | hypothetical protein [Neurospora crassa] gb EAA35466.1  hypothetical protein [Neurospora crassa] emb CAE76318.1  related to glyoxal oxidase precursor [Neurospora crassa]                             | 47    | 2.00E-04 |                 |
|                   |     | ref XP_391273.1      | hypothetical protein FG11097.1 [Gibberella zeae PH-1] gb EAA74748.1  hypothetical protein FG11097.1 [Gibberella zeae PH-1]                                                                            | 46    | 3.00E-04 |                 |
|                   |     | ref XP_385939.1      | hypothetical protein FG05763.1 [Gibberella zeae PH-1] gb EAA75838.1  hypothetical protein FG05763.1 [Gibberella zeae PH-1]                                                                            | 45    | 4.00E-04 |                 |
|                   |     | ref XP_323510.1      | hypothetical protein [Neurospora crassa] gb EAA31492.1  hypothetical protein [Neurospora crassa]                                                                                                      | 45    | 5.00E-04 |                 |
|                   |     | emb CAD11404.1       | hypothetical protein [Neurospora crassa]                                                                                                                                                              | 45    | 5.00E-04 |                 |
|                   |     | gb EAA56004.1        | hypothetical protein MG01655.4 [Magnaporthe grisea 70-15]                                                                                                                                             | 44    | 0.001    |                 |
|                   |     | sp Q90Y90 KRM1_XENL  | Kremen protein 1 precursor (Kringle-containing protein marking the eye and the nose) (Dickkopf receptor) dbj BAB64294.1  KREMEN [Xenopus laevis]                                                      | 44    | 0.001    |                 |
|                   |     | ref XP_409797.1      | hypothetical protein AN5660.2 [Aspergillus nidulans FGSC A4] gb EAA62753.1  hypothetical protein AN5660.2 [Aspergillus nidulans FGSC A4]                                                              | 44    | 0.001    |                 |
|                   |     | emb CAC18170.2       | related to beta-1, 3 exoglucanase precursor [Neurospora crassa]                                                                                                                                       | 44    | 0.001    |                 |
| 1 Zoo I E01 5 09  | 563 | gb AAN64681.1        | kremen2 [Xenopus laevis]                                                                                                                                                                              | 47    | 2.00E-04 | receptors       |
|                   |     | ref XP_385939.1      | hypothetical protein FG05763.1 [Gibberella zeae PH-1] gb EAA75838.1  hypothetical protein FG05763.1 [Gibberella zeae PH-1]                                                                            | 44    | 0.001    |                 |
|                   |     | emb CAG08177.1       | unnamed protein product [Tetraodon nigroviridis]                                                                                                                                                      | 43    | 0.004    |                 |
|                   |     | ref NP_446101.1      | kringle-containing transmembrane protein 1 [Rattus norvegicus] sp Q924S4 KRM1_RAT Kremen protein 1 precursor (Kringle-containing protein marking the eye and the nose) (Dickkopf receptor) dbj BAB    | 43    | 0.004    |                 |
|                   |     | sp Q96MU8 KRM1_HUM   | Kremen protein 1 precursor (Kringle-containing protein marking the eye and the nose) (Dickkopf receptor)                                                                                              | 42    | 0.006    |                 |
|                   |     | ref NP_700358.1      | kringle-containing transmembrane protein 1 isoform 1 precursor; kringle-coding gene marking the eye and the nose; kringle containing transmembrane protein [Homo sapiens] dbj BAB40969.1  kringle-cor | 42    | 0.006    |                 |
|                   |     | ref NP_115772.1      | kringle-containing transmembrane protein 1; kringle-coding gene marking the eye and the nose [Mus musculus] sp Q99N43 KRM1_MOUSE Kremen protein 1 precursor (Kringle-containing protein marking       | 42    | 0.006    |                 |
|                   |     | ref NP_114434.3      | kringle-containing transmembrane protein 1 isoform 2 precursor; kringle-coding gene marking the eye and the nose; kringle containing transmembrane protein [Homo sapiens]                             | 42    | 0.006    |                 |
|                   |     | dbj BAB71180.1       | unnamed protein product [Homo sapiens]                                                                                                                                                                | 42    | 0.006    |                 |
|                   |     | dbj BAC38952.1       | unnamed protein product [Mus musculus]                                                                                                                                                                | 42    | 0.006    |                 |
| 1 Zoo I F09 69 09 | 471 | ref XP_331659.1      | hypothetical protein [Neurospora crassa] gb EAA35466.1  hypothetical protein [Neurospora crassa] emb CAE76318.1  related to glyoxal oxidase precursor [Neurospora crassa]                             | 47    | 2.00E-04 | receptors       |
|                   |     | ref XP_385939.1      | hypothetical protein FG05763.1 [Gibberella zeae PH-1] gb EAA75838.1  hypothetical protein FG05763.1 [Gibberella zeae PH-1]                                                                            | 46    | 2.00E-04 |                 |
|                   |     | ref XP_390611.1      | hypothetical protein FG10435.1 [Gibberella zeae PH-1] gb EAA68209.1  hypothetical protein FG10435.1 [Gibberella zeae PH-1]                                                                            | 46    | 3.00E-04 |                 |
|                   |     | ref XP_391273.1      | hypothetical protein FG11097.1 [Gibberella zeae PH-1] gb EAA74748.1  hypothetical protein FG11097.1 [Gibberella zeae PH-1]                                                                            | 45    | 4.00E-04 |                 |
|                   |     | gb EAA56004.1        | hypothetical protein MG01655.4 [Magnaporthe grisea 70-15]                                                                                                                                             | 45    | 5.00E-04 |                 |
|                   |     | sp Q90Y90 KRM1_XENL  | Kremen protein 1 precursor (Kringle-containing protein marking the eye and the nose) (Dickkopf receptor) dbj BAB64294.1  KREMEN [Xenopus laevis]                                                      | 45    | 5.00E-04 |                 |
|                   |     | ref XP_409797.1      | hypothetical protein AN5660.2 [Aspergillus nidulans FGSC A4] gb EAA62753.1  hypothetical protein AN5660.2 [Aspergillus nidulans FGSC A4]                                                              | 45    | 7.00E-04 |                 |
|                   |     | ref XP_323510.1      | hypothetical protein [Neurospora crassa] gb EAA31492.1  hypothetical protein [Neurospora crassa]                                                                                                      | 44    | 0.001    |                 |
|                   |     | emb CAD11404.1       | hypothetical protein [Neurospora crassa]                                                                                                                                                              | 44    | 0.001    |                 |
|                   |     | emb CAC18170.2       | related to beta-1, 3 exoglucanase precursor [Neurospora crassa]                                                                                                                                       | 44    | 0.001    |                 |

Additional file 3: Subtraction library BLAST results top 10. Engine: NCBI. Database: NR.

| Clone                | bp                                                                                                                                                                                                    | ID                   | Homology                                                                                                                                                                                              | Score           | E value                                                                         | category  |
|----------------------|-------------------------------------------------------------------------------------------------------------------------------------------------------------------------------------------------------|----------------------|-------------------------------------------------------------------------------------------------------------------------------------------------------------------------------------------------------|-----------------|---------------------------------------------------------------------------------|-----------|
| 1 Zoo II A02 105 02  | 440                                                                                                                                                                                                   | ref XP_390611.1      | hypothetical protein FG10435.1 [Gibberella zeae PH-1] gb EAA68209.1  hypothetical protein FG10435.1 [Gibberella zeae PH-1]                                                                            | 47              | 8,00E-05                                                                        | receptors |
|                      |                                                                                                                                                                                                       | ref XP_331659.1      | hypothetical protein [Neurospora crassa] gb EAA35466.1  hypothetical protein [Neurospora crassa] emb CAE76318.1  related to glyoxal oxidase precursor [Neurospora crassa]                             | 47              | 1,00E-04                                                                        |           |
|                      |                                                                                                                                                                                                       | ref XP_391273.1      | hypothetical protein FG11097.1 [Gibberella zeae PH-1] gb EAA74748.1  hypothetical protein FG11097.1 [Gibberella zeae PH-1]                                                                            | 46              | 2,00E-04                                                                        |           |
|                      |                                                                                                                                                                                                       | ref XP_385939.1      | hypothetical protein FG05763.1 [Gibberella zeae PH-1] gb EAA75838.1  hypothetical protein FG05763.1 [Gibberella zeae PH-1]                                                                            | 45              | 2,00E-04                                                                        |           |
|                      |                                                                                                                                                                                                       | emb CAD11404.1       | hypothetical protein [Neurospora crassa]                                                                                                                                                              | 45              | 3,00E-04                                                                        |           |
|                      |                                                                                                                                                                                                       | ref XP_323510.1      | hypothetical protein [Neurospora crassa] gb EAA31492.1  hypothetical protein [Neurospora crassa]                                                                                                      | 45              | 3,00E-04                                                                        |           |
|                      |                                                                                                                                                                                                       | sp Q90Y90 KRM1_XFENL | Kremen protein 1 precursor (Kringle-containing protein marking the eye and the nose) (Dickkopf receptor) dbj BAB64294.1  KREMEN [Xenopus laevis]                                                      | 44              | 5,00E-04                                                                        |           |
|                      |                                                                                                                                                                                                       | gb EAA56004.1        | hypothetical protein MG01655.4 [Magnaporthe grisea 70-15]                                                                                                                                             | 44              | 5,00E-04                                                                        |           |
|                      |                                                                                                                                                                                                       | emb CAC18170.2       | related to beta-1, 3 exoglucanase precursor [Neurospora crassa]                                                                                                                                       | 44              | 7,00E-04                                                                        |           |
|                      |                                                                                                                                                                                                       | ref XP_409797.1      | hypothetical protein AN5660.2 [Aspergillus nidulans FGSC A4] gb EAA62753.1  hypothetical protein AN5660.2 [Aspergillus nidulans FGSC A4]                                                              | 44              | 7,00E-04                                                                        |           |
|                      |                                                                                                                                                                                                       | 1 Zoo I C05 35 05    | 447                                                                                                                                                                                                   | ref XP_393020.1 | similar to CG6120-PA [Apis mellifera]                                           | 41        |
| pir I22544           | hypothetical protein F53B6.1 - Caenorhabditis elegans                                                                                                                                                 |                      |                                                                                                                                                                                                       | 40              | 0,01                                                                            |           |
| ref NP_492404.1      | tetraspanin family member (tsp-15) [Caenorhabditis elegans] emb CAB03120.2  C. elegans TSP-15 protein (corresponding sequence F53B6.1) [Caenorhabditis elegans]                                       |                      |                                                                                                                                                                                                       | 40              | 0,01                                                                            |           |
| emb CAF66995.1       | Hypothetical protein CBG12393 [Caenorhabditis briggsae]                                                                                                                                               |                      |                                                                                                                                                                                                       | 40              | 0,01                                                                            |           |
| gb AAP36787.1        | Homo sapiens CD63 antigen (melanoma 1 antigen) [synthetic construct]                                                                                                                                  |                      |                                                                                                                                                                                                       | 37              | 0,062                                                                           |           |
| gb AAH67604.1        | Unknown (protein for IMAGE:6959852) [Danio rerio]                                                                                                                                                     |                      |                                                                                                                                                                                                       | 37              | 0,062                                                                           |           |
| gb AAH76407.1        | Unknown (protein for MGC:100919) [Danio rerio]                                                                                                                                                        |                      |                                                                                                                                                                                                       | 37              | 0,062                                                                           |           |
| ref NP_001771.1      | CD63 antigen; melanoma 1 antigen; ocular melanoma-associated antigen; melanoma-associated antigen ME491; lysosome-associated membrane glycoprotein 3; granulophysin; melanoma-associated ar           |                      |                                                                                                                                                                                                       | 37              | 0,062                                                                           |           |
| gb AAH34259.1        | lysosome-associated membrane protein-3 variant [Homo sapiens]                                                                                                                                         |                      |                                                                                                                                                                                                       | 37              | 0,062                                                                           |           |
| gb AAH74552.1        | Unknown (protein for MGC:69509) [Xenopus tropicalis]                                                                                                                                                  |                      |                                                                                                                                                                                                       | 36              | 0,18                                                                            |           |
| 1 Zoo I D03 20 07    | 381                                                                                                                                                                                                   |                      |                                                                                                                                                                                                       | gb EAL_22113.1  | hypothetical protein CNBC2510 [Cryptococcus neoformans var. neoformans B-3501A] | 42        |
|                      |                                                                                                                                                                                                       | ref XP_331659.1      | hypothetical protein [Neurospora crassa] gb EAA35466.1  hypothetical protein [Neurospora crassa] emb CAE76318.1  related to glyoxal oxidase precursor [Neurospora crassa]                             | 40              | 0,011                                                                           |           |
|                      |                                                                                                                                                                                                       | sp P83097 WSCK_DRO   | Putative tyrosine-protein kinase Wsck precursor                                                                                                                                                       | 39              | 0,018                                                                           |           |
|                      |                                                                                                                                                                                                       | ref NP_733018.1      | CG31127-PA [Drosophila melanogaster] gb AAN14006.1  CG31127-PA [Drosophila melanogaster] gb AAN71639.1  SD05152p [Drosophila melanogaster]                                                            | 39              | 0,018                                                                           |           |
|                      |                                                                                                                                                                                                       | ref XP_387414.1      | hypothetical protein FG07238.1 [Gibberella zeae PH-1] gb EAA77836.1  hypothetical protein FG07238.1 [Gibberella zeae PH-1]                                                                            | 38              | 0,04                                                                            |           |
|                      |                                                                                                                                                                                                       | ref XP_383926.1      | hypothetical protein FG03750.1 [Gibberella zeae PH-1] gb EAA71442.1  hypothetical protein FG03750.1 [Gibberella zeae PH-1]                                                                            | 38              | 0,052                                                                           |           |
|                      |                                                                                                                                                                                                       | gb EAL_19732.1       | hypothetical protein CNBG3600 [Cryptococcus neoformans var. neoformans B-3501A]                                                                                                                       | 37              | 0,089                                                                           |           |
|                      |                                                                                                                                                                                                       | ref XP_220206.2      | similar to Kremen2 protein [Rattus norvegicus]                                                                                                                                                        | 36              | 0,15                                                                            |           |
|                      |                                                                                                                                                                                                       | ref NP_082692.1      | kringle-containing transmembrane protein 2 [Mus musculus] sp Q8K1S7 KRM2_MOUSE Kremen protein 2 precursor (Kringle-containing protein marking the eye and the nose) (Dickkopf receptor 2) emb C       | 36              | 0,15                                                                            |           |
|                      |                                                                                                                                                                                                       | ref XP_139908.1      | similar to hypothetical protein MGC10791 [Mus musculus]                                                                                                                                               | 36              | 0,15                                                                            |           |
|                      |                                                                                                                                                                                                       | 1 Zoo I B09 66 03    | 593                                                                                                                                                                                                   | emb CAF65829.1  | Hypothetical protein CBG10951 [Caenorhabditis briggsae]                         | 41        |
| sp Q35566 C151_MOUSE | Platelet-endothelial tetraspan antigen 3 (PETA-3) (GP27) (Membrane glycoprotein SFA-1) (CD151 antigen) gb AAC25976.1  PETA-3 [Mus musculus] gb AAC25952.1  platelet endothelial tetraspan antigen     |                      |                                                                                                                                                                                                       | 39              | 0,054                                                                           |           |
| ref NP_033972.1      | CD151 antigen [Mus musculus] dbj BAA22447.1  SFA-1 [Mus musculus]                                                                                                                                     |                      |                                                                                                                                                                                                       | 39              | 0,054                                                                           |           |
| ref NP_071968.1      | CD151 antigen; platelet endothelial tetraspan antigen-3 [Rattus norvegicus] sp Q9QZA6 C151_RAT Platelet endothelial tetraspan antigen 3 (CD151 antigen) gb AAF05763.2  platelet endothelial tetraspan |                      |                                                                                                                                                                                                       | 39              | 0,071                                                                           |           |
| gb AAH12236.1        | Cd151 protein [Mus musculus]                                                                                                                                                                          |                      |                                                                                                                                                                                                       | 37              | 0,27                                                                            |           |
| ref XP_372453.1      | similar to RIKEN cDNA 1110014F12 [Homo sapiens]                                                                                                                                                       |                      |                                                                                                                                                                                                       | 35              | 0,78                                                                            |           |
| ref NP_666285.1      | hypothetical protein MGC30714 [Mus musculus] gb AAH24685.1  Hypothetical protein MGC30714 [Mus musculus]                                                                                              |                      |                                                                                                                                                                                                       | 35              | 1                                                                               |           |
| ref NP_477766.1      | wsv244 [shrimp white spot syndrome virus] gb AAL33248.1  wsv244 [shrimp white spot syndrome virus]                                                                                                    |                      |                                                                                                                                                                                                       | 34              | 1,7                                                                             |           |
| gb AAK77790.1        | ORF121 [shrimp white spot syndrome virus] gb AAL89167.1  WSSV299 [shrimp white spot syndrome virus]                                                                                                   |                      |                                                                                                                                                                                                       | 34              | 1,7                                                                             |           |
| ref XP_394297.1      | similar to ENSANGP0000017817 [Apis mellifera]                                                                                                                                                         |                      |                                                                                                                                                                                                       | 34              | 2,3                                                                             |           |
| 1 Zoo I E05 37 09    | 596                                                                                                                                                                                                   |                      |                                                                                                                                                                                                       | emb CAF65829.1  | Hypothetical protein CBG10951 [Caenorhabditis briggsae]                         | 41        |
|                      |                                                                                                                                                                                                       | ref NP_071968.1      | CD151 antigen; platelet endothelial tetraspan antigen-3 [Rattus norvegicus] sp Q9QZA6 C151_RAT Platelet endothelial tetraspan antigen 3 (CD151 antigen) gb AAF05763.2  platelet endothelial tetraspan | 40              | 0,025                                                                           |           |
|                      |                                                                                                                                                                                                       | sp Q35566 C151_MOUSE | Platelet-endothelial tetraspan antigen 3 (PETA-3) (GP27) (Membrane glycoprotein SFA-1) (CD151 antigen) gb AAC25976.1  PETA-3 [Mus musculus] gb AAC25952.1  platelet endothelial tetraspan antigen     | 40              | 0,025                                                                           |           |
|                      |                                                                                                                                                                                                       | ref NP_033972.1      | CD151 antigen [Mus musculus] dbj BAA22447.1  SFA-1 [Mus musculus]                                                                                                                                     | 40              | 0,025                                                                           |           |
|                      |                                                                                                                                                                                                       | gb AAH12236.1        | Cd151 protein [Mus musculus]                                                                                                                                                                          | 38              | 0,12                                                                            |           |
|                      |                                                                                                                                                                                                       | dbj BAD04070.1       | CD63 antigen [Felis catus]                                                                                                                                                                            | 38              | 0,16                                                                            |           |
|                      |                                                                                                                                                                                                       | sp P48509 C151_HUMA  | Platelet-endothelial tetraspan antigen 3 (PETA-3) (GP27) (Membrane glycoprotein SFA-1) (CD151 antigen) dbj BAA06229.1  CD151 [Homo sapiens] gb AAK14179.1  hemidesmosomal tetraspanin CD151           | 37              | 0,21                                                                            |           |
|                      |                                                                                                                                                                                                       | ref NP_999939.1      | zgc:63823 [Danio rerio] gb AAH55255.1  Zgc:63823 [Danio rerio]                                                                                                                                        | 37              | 0,27                                                                            |           |
|                      |                                                                                                                                                                                                       | gb AAP36787.1        | Homo sapiens CD63 antigen (melanoma 1 antigen) [synthetic construct]                                                                                                                                  | 36              | 0,61                                                                            |           |
|                      |                                                                                                                                                                                                       | ref NP_001771.1      | CD63 antigen; melanoma 1 antigen; ocular melanoma-associated antigen; melanoma-associated antigen ME491; lysosome-associated membrane glycoprotein 3; granulophysin; melanoma-associated ar           | 36              | 0,61                                                                            |           |
|                      |                                                                                                                                                                                                       | 1 Zoo I F02 14 12    | 495                                                                                                                                                                                                   | gb AAM73990.1   | alpha-tubulin 3 [Strongylocentrotus droebachiensis]                             | 267       |
| sp P18258 TBA1_PARL  | TUBULIN ALPHA-1 CHAIN pir S11207 tubulin alpha chain - sea urchin (Paracentrotus lividus) emb CAA37680.1  unnamed protein product [Paracentrotus lividus]                                             |                      |                                                                                                                                                                                                       | 266             | 1,00E-70                                                                        |           |
| gb AAP80598.1        | putative alpha-tubulin [Oikopleura dioica]                                                                                                                                                            |                      |                                                                                                                                                                                                       | 266             | 1,00E-70                                                                        |           |
| pir A60671           | tubulin alpha chain - sea urchin (Paracentrotus lividus)                                                                                                                                              |                      |                                                                                                                                                                                                       | 266             | 2,00E-70                                                                        |           |
| gb AAP80595.1        | putative alpha-tubulin [Oikopleura dioica]                                                                                                                                                            |                      |                                                                                                                                                                                                       | 266             | 2,00E-70                                                                        |           |
| gb AAB07727.1        | alpha-1 tubulin [Hirudo medicinalis] gb AAB07890.1  alpha-1 tubulin [Hirudo medicinalis]                                                                                                              |                      |                                                                                                                                                                                                       | 266             | 2,00E-70                                                                        |           |
| sp P41383 TBA2_PATV  | TUBULIN ALPHA-2/ALPHA-4 CHAIN pir S42033 tubulin alpha chain - common limpet emb CAA54712.1  alpha tubulin [Patella vulgata] emb CAA55978.1  alpha tubulin 2 [Patella vulgata]                        |                      |                                                                                                                                                                                                       | 265             | 2,00E-70                                                                        |           |
| gb AAP49551.1        | alpha-tubulin [Aurelia aurita]                                                                                                                                                                        |                      |                                                                                                                                                                                                       | 265             | 2,00E-70                                                                        |           |
| gb AAC97929.1        | alpha tubulin [Notothenia coriiceps] gb AAG15324.1  alpha tubulin [Notothenia coriiceps]                                                                                                              |                      |                                                                                                                                                                                                       | 265             | 2,00E-70                                                                        |           |
| ref XP_147357.1      | tubulin alpha 6 [Mus musculus]                                                                                                                                                                        |                      |                                                                                                                                                                                                       | 265             | 3,00E-70                                                                        |           |

Additional file 3: Subtraction library BLAST results top 10. Engine: NCBI Database: NR.

| Clone             | bp  | ID                   | Homology                                                                                                                                                                                               | Score | E value  | category   |
|-------------------|-----|----------------------|--------------------------------------------------------------------------------------------------------------------------------------------------------------------------------------------------------|-------|----------|------------|
| 1 Zoo I G04 31 14 | 448 | ref NP_729025.1      | CG32238-PA [Drosophila melanogaster] gb AAF47928.1  CG32238-PA [Drosophila melanogaster]                                                                                                               | 45    | 2.00E-04 | cytoscelet |
|                   |     | ref NP_573197.2      | CG8918-PA [Drosophila melanogaster] gb AAF48704.1  CG8918-PA [Drosophila melanogaster]                                                                                                                 | 45    | 2.00E-04 |            |
|                   |     | gb AAK92989.1        | GH21352p [Drosophila melanogaster]                                                                                                                                                                     | 45    | 2.00E-04 |            |
|                   |     | sp Q80UG8 TTL4_MOUSE | Tubulin tyrosine ligase-like protein 4 dbj BAC97885.1  mKIAA0173 protein [Mus musculus]                                                                                                                | 44    | 5.00E-04 |            |
|                   |     | ref XP_237292.2      | similar to Hypothetical protein KIAA0173 [Rattus norvegicus]                                                                                                                                           | 44    | 5.00E-04 |            |
|                   |     | ref XP_129771.3      | expressed sequence AI451681 [Mus musculus]                                                                                                                                                             | 44    | 5.00E-04 |            |
|                   |     | sp Q14679 TTL4_HUMAN | Tubulin tyrosine ligase-like protein 4                                                                                                                                                                 | 44    | 5.00E-04 |            |
|                   |     | ref NP_055455.2      | tubulin tyrosine ligase-like family, member 4 [Homo sapiens] gb AAH21707.1  Tubulin tyrosine ligase-like family, member 4 [Homo sapiens]                                                               | 44    | 5.00E-04 |            |
|                   |     | db BAA11490.2        | KIAA0173 [Homo sapiens]                                                                                                                                                                                | 44    | 5.00E-04 |            |
|                   |     | ref XP_092778.3      | similar to RIKEN cDNA 4930509O20 [Homo sapiens]                                                                                                                                                        | 44    | 7.00E-04 |            |
| 1 Zoo I G05 39 13 | 545 | emb CAF96334.1       | unnamed protein product [Tetraodon nigroviridis]                                                                                                                                                       | 44    | 0.002    | cytoscelet |
|                   |     | ref XP_195428.2      | similar to dJ366N23.3 (NYD-TSPG protein) [Mus musculus]                                                                                                                                                | 43    | 0.004    |            |
|                   |     | ref XP_092778.3      | similar to RIKEN cDNA 4930509O20 [Homo sapiens]                                                                                                                                                        | 42    | 0.005    |            |
|                   |     | sp P38160 TTL_PIG    | Tubulin--tyrosine ligase (TTL) pir A45443 tubulin-tyrosine ligase (EC 6.3.2.25) [validated] - pig emb CAA48494.1  tubulin-tyrosine ligase [Sus scrofa]                                                 | 42    | 0.005    |            |
|                   |     | emb CAD98091.1       | hypothetical protein [Homo sapiens]                                                                                                                                                                    | 41    | 0.012    |            |
|                   |     | ref NP_714923.1      | tubulin tyrosine ligase; tubulin-tyrosine ligase; 2410003M22Rik [Homo sapiens] sp Q8NG68 TTL_HUMAN Tubulin--tyrosine ligase (TTL) gb AAH36819.1  TTL protein [Homo sapiens] dbj BAC06832.2  tub        | 41    | 0.012    |            |
|                   |     | ref XP_217869.2      | similar to dJ366N23.3 (NYD-TSPG protein) [Rattus norvegicus]                                                                                                                                           | 41    | 0.015    |            |
|                   |     | ref NP_083340.1      | RIKEN cDNA 4930509O20 [Mus musculus] dbj BAB29950.1  unnamed protein product [Mus musculus]                                                                                                            | 40    | 0.020    |            |
|                   |     | emb CAE65034.1       | Hypothetical protein CBG09874 [Caenorhabditis briggsae]                                                                                                                                                | 40    | 0.02     |            |
|                   |     | sp P38584 TTL_BOVIN  | Tubulin--tyrosine ligase (TTL)                                                                                                                                                                         | 40    | 0.026    |            |
| 1 Zoo I G11 87 13 | 495 | emb CAA30852.1       | alpha tubulin [Gallus gallus]                                                                                                                                                                          | 269   | 2.00E-71 | cytoscelet |
|                   |     | sp P09644 TBA5_CHICK | TUBULIN ALPHA-5 CHAIN                                                                                                                                                                                  | 269   | 2.00E-71 |            |
|                   |     | pir IURCHA5          | tubulin alpha-5 chain - chicken                                                                                                                                                                        | 269   | 2.00E-71 |            |
|                   |     | gb AAM73990.1        | alpha-tubulin 3 [Strongylocentrotus droebachiensis]                                                                                                                                                    | 269   | 2.00E-71 |            |
|                   |     | gb AAC97929.1        | alpha tubulin [Notothenia coriiceps] gb AAG15324.1  alpha tubulin [Notothenia coriiceps]                                                                                                               | 268   | 3.00E-71 |            |
|                   |     | sp P18258 TBA1_PARL  | TUBULIN ALPHA-1 CHAIN pir S11207 tubulin alpha chain - sea urchin (Paracentrotus lividus) emb CAA37680.1  unnamed protein product [Paracentrotus lividus]                                              | 268   | 3.00E-71 |            |
|                   |     | ref XP_147357.1      | tubulin alpha 6 [Mus musculus]                                                                                                                                                                         | 268   | 3.00E-71 |            |
|                   |     | ref NP_033474.1      | tubulin, alpha 6; tubulin alpha 6 [Mus musculus] sp P05216 TBA6_MOUSE Tubulin alpha-6 chain (Alpha-tubulin 6) pir J77428 tubulin alpha chain isotype M-alpha-6 - mouse gb AAA40503.1  alpha-tubulin    | 268   | 3.00E-71 |            |
|                   |     | sp P08537 TBA_XENLA  | Tubulin alpha chain pir S00253 tubulin alpha chain - African clawed frog emb CAA30094.1  unnamed protein product [Xenopus laevis]                                                                      | 268   | 3.00E-71 |            |
|                   |     | ref NP_116093.1      | tubulin alpha 6 [Homo sapiens] sp Q9BQE3 TBA6_HUMAN Tubulin alpha-6 chain (Alpha-tubulin 6) gb AAH04949.1  Tubulin alpha 6 [Homo sapiens] gb A                                                         | 268   | 3.00E-71 |            |
| 1 Zoo I H04 32 16 | 487 | ref XP_233723.2      | similar to hypothetical protein FLJ36119 [Rattus norvegicus]                                                                                                                                           | 52    | 4.00E-06 | cytoscelet |
|                   |     | ref XP_340624.1      | tubulin-tyrosine ligase, putative [Trypanosoma brucei] gb AAQ15983.1  tubulin-tyrosine ligase, putative [Trypanosoma brucei]                                                                           | 47    | 2.00E-04 |            |
|                   |     | ref XP_195428.2      | similar to dJ366N23.3 (NYD-TSPG protein) [Mus musculus]                                                                                                                                                | 46    | 3.00E-04 |            |
|                   |     | dbj BAC85781.1       | unnamed protein product [Homo sapiens]                                                                                                                                                                 | 45    | 4.00E-04 |            |
|                   |     | ref NP_701337.1      | hypothetical protein [Plasmodium falciparum 3D7] gb AAN36061.1  hypothetical protein [Plasmodium falciparum 3D7]                                                                                       | 44    | 0.001    |            |
|                   |     | pir E88575           | protein ZK1128.6 [imported] - Caenorhabditis elegans                                                                                                                                                   | 44    | 0.002    |            |
|                   |     | pir T27699           | hypothetical protein ZK1128.6 - Caenorhabditis elegans                                                                                                                                                 | 44    | 0.002    |            |
|                   |     | ref NP_499251.2      | tubulin-tyrosine ligase (69.1 kD) (3L221) [Caenorhabditis elegans] emb CAA87425.3  Hypothetical protein ZK1128.6 [Caenorhabditis elegans]                                                              | 44    | 0.002    |            |
|                   |     | gb FAA21855.1        | Tubulin-tyrosine ligase family, putative [Plasmodium yoelii yoelii]                                                                                                                                    | 42    | 0.004    |            |
|                   |     | ref XP_396662.1      | similar to ENSANGP00000021502 [Apis mellifera]                                                                                                                                                         | 41    | 0.008    |            |
| 1 Zoo I A10 73 02 | 354 | dbj BAB88855.1       | cysteine sulfinic acid decarboxylase [Ciona intestinalis]                                                                                                                                              | 95    | 4.00E-19 | metabolism |
|                   |     | ref XP_291059.3      | similar to cysteine sulfinic acid decarboxylase [Homo sapiens]                                                                                                                                         | 95    | 4.00E-19 |            |
|                   |     | ref XP_392052.1      | similar to ENSANGP00000014813 [Apis mellifera]                                                                                                                                                         | 93    | 1.00E-18 |            |
|                   |     | ref NP_659191.1      | cysteine sulfinic acid decarboxylase [Mus musculus] sp Q9DBE0 CSD_MOUSE Cysteine sulfinic acid decarboxylase (Sulfinioalanine decarboxylase) (Cysteine-sulfinate decarboxylase) dbj BAB23747.1  u      | 92    | 2.00E-18 |            |
|                   |     | gb AAK60398.1        | cysteine sulfinic acid decarboxylase [Mus musculus]                                                                                                                                                    | 92    | 2.00E-18 |            |
|                   |     | ref XP_345994.1      | similar to cysteine sulfinic acid decarboxylase [Rattus norvegicus]                                                                                                                                    | 90    | 9.00E-18 |            |
|                   |     | gb AAH52327.1        | Unknown (protein for IMAGE:6313667) [Mus musculus]                                                                                                                                                     | 90    | 9.00E-18 |            |
|                   |     | ref XP_135211.2      | RIKEN cDNA 1110027M19 [Mus musculus]                                                                                                                                                                   | 90    | 9.00E-18 |            |
|                   |     | ref NP_068518.1      | cysteine-sulfinate decarboxylase [Rattus norvegicus] sp Q64611 CSD_RAT Cysteine sulfinic acid decarboxylase (Sulfinioalanine decarboxylase) (Cysteine-sulfinate decarboxylase) pir S71489 sulfinioalan | 89    | 2.00E-17 |            |
|                   |     | gb AA42063.1         | cysteine sulfinic acid decarboxylase prf Z113203A Cys sulfinic acid decarboxylase                                                                                                                      | 89    | 2.00E-17 |            |
| 1 Zoo I C07 51 05 | 395 | ref NP_612071.1      | CG13904-PA [Drosophila melanogaster] gb AAF47429.1  CG13904-PA [Drosophila melanogaster]                                                                                                               | 107   | 5.00E-23 | metabolism |
|                   |     | gb AA190165.1        | AT24870p [Drosophila melanogaster]                                                                                                                                                                     | 105   | 3.00E-22 |            |
|                   |     | ref NP_608720.1      | CG18558-PA [Drosophila melanogaster] gb AAF51196.2  CG18558-PA [Drosophila melanogaster]                                                                                                               | 105   | 3.00E-22 |            |
|                   |     | emb CAE71479.1       | Hypothetical protein CBG18398 [Caenorhabditis briggsae]                                                                                                                                                | 104   | 3.00E-22 |            |
|                   |     | pir T19837           | hypothetical protein C38H2.2 - Caenorhabditis elegans                                                                                                                                                  | 103   | 1.00E-21 |            |
|                   |     | ref NP_499293.2      | core1 UDP-galactose-N-acetylglucosamine-alpha-R beta 1,3-galactosyltransferase (44.1 kD) (3L473) [Caenorhabditis elegans] gb AAG36940.1  core1 UDP-galactose-N-acetylglucosamine-alpha-R bet           | 103   | 1.00E-21 |            |
|                   |     | gb AAH03174.1        | Unknown (protein for IMAGE:2957836) [Homo sapiens]                                                                                                                                                     | 95    | 3.00E-19 |            |
|                   |     | ref NP_724853.1      | CG8708-PB [Drosophila melanogaster] gb AAM68854.1  CG8708-PB [Drosophila melanogaster] gb AAN71398.1  RE41083p [Drosophila melanogaster]                                                               | 95    | 3.00E-19 |            |
|                   |     | ref NP_064541.1      | core1 UDP-galactose-N-acetylglucosamine-alpha-R beta 1,3-galac [Homo sapiens] gb AAF81981.1  core1 UDP-galactose-N-acetylglucosamine-alpha-R beta 1,3-galactosyltransferase [Homo sapiens]             | 95    | 3.00E-19 |            |
|                   |     | emb CAC45046.1       | beta-1,3-galactosyltransferase b3Gal-T8 [Homo sapiens]                                                                                                                                                 | 95    | 3.00E-19 |            |

Additional file 3: Subtraction library BLAST results top 10. Engine: NCBI. Database: NR.

| Clone               | bp                                                                                                                                                                 | ID                  | Homology                                                                                                                                                                                              | Score | E value  | category                 |
|---------------------|--------------------------------------------------------------------------------------------------------------------------------------------------------------------|---------------------|-------------------------------------------------------------------------------------------------------------------------------------------------------------------------------------------------------|-------|----------|--------------------------|
| 1 Zoo I E10 77 10   | 552                                                                                                                                                                | ref XP_233723.2     | similar to hypothetical protein FLJ36119 [Rattus norvegicus]                                                                                                                                          | 54    | 2.00E-06 | metabolism               |
|                     |                                                                                                                                                                    | ref XP_340624.1     | tubulin-tyrosine ligase, putative [Trypanosoma brucei] gb AAQ15983.1  tubulin-tyrosine ligase, putative [Trypanosoma brucei]                                                                          | 47    | 2.00E-04 |                          |
|                     |                                                                                                                                                                    | db BAC85781.1       | unnamed protein product [Homo sapiens]                                                                                                                                                                | 45    | 6.00E-04 |                          |
|                     |                                                                                                                                                                    | ref NP_701337.1     | hypothetical protein [Plasmodium falciparum 3D7] gb AAN36061.1  hypothetical protein [Plasmodium falciparum 3D7]                                                                                      | 45    | 8.00E-04 |                          |
|                     |                                                                                                                                                                    | ref XP_195428.2     | similar to dJ366N23.3 (NYD-TSPG protein) [Mus musculus]                                                                                                                                               | 44    | 0.001    |                          |
|                     |                                                                                                                                                                    | ref NP_499251.2     | tubulin-tyrosine ligase (69.1 kD) (3L221) [Caenorhabditis elegans] emb CAA87425.3  Hypothetical protein ZK1128.6 [Caenorhabditis elegans]                                                             | 44    | 0.002    |                          |
|                     |                                                                                                                                                                    | pir IT27699         | hypothetical protein ZK1128.6 - Caenorhabditis elegans                                                                                                                                                | 44    | 0.002    |                          |
|                     |                                                                                                                                                                    | pir E88575          | protein ZK1128.6 [imported] - Caenorhabditis elegans                                                                                                                                                  | 44    | 0.002    |                          |
|                     |                                                                                                                                                                    | gb FAA21855.1       | Tubulin-tyrosine ligase family, putative [Plasmodium yoelii yoelii]                                                                                                                                   | 44    | 0.002    |                          |
|                     |                                                                                                                                                                    | ref XP_217869.2     | similar to dJ366N23.3 (NYD-TSPG protein) [Rattus norvegicus]                                                                                                                                          | 42    | 0.007    |                          |
| 1 Zoo I B11 82 03   | 365                                                                                                                                                                | gb EAL_19461.1      | hypothetical protein CNBG4080 [Cryptococcus neoformans var. neoformans B-3501A]                                                                                                                       | 39    | 0.018    | metabolism               |
|                     |                                                                                                                                                                    | gb EAA54899.1       | hypothetical protein MG05690.4 [Magnaporthe grisea 70-15]                                                                                                                                             | 37    | 0.091    |                          |
|                     |                                                                                                                                                                    | ref XP_322395.1     | hypothetical protein [Neurospora crassa] gb EAA28544.1  hypothetical protein [Neurospora crassa]                                                                                                      | 37    | 0.12     |                          |
|                     |                                                                                                                                                                    | gb FAI_04370.1      | hypothetical protein CaO19.5867 [Candida albicans SC5314]                                                                                                                                             | 37    | 0.12     |                          |
|                     |                                                                                                                                                                    | gb EAL_04216.1      | hypothetical protein CaO19.13289 [Candida albicans SC5314]                                                                                                                                            | 37    | 0.12     |                          |
|                     |                                                                                                                                                                    | ref NP_595526.1     | hypothetical protein [Schizosaccharomyces pombe] emb CAB09116.1  transmembrane receptor activity (predicted); serine-rich protein; WSC domain; carbohydrate binding (predicted); proteophosphoglyc    | 35    | 0.35     |                          |
|                     |                                                                                                                                                                    | sp P8179 YB1E_SCHP  | Serine-rich protein C30B4.01c precursor emb CAA20314.2  SPBC30B4.01c [Schizosaccharomyces pombe]                                                                                                      | 35    | 0.35     |                          |
|                     |                                                                                                                                                                    | pir IT40167         | hypothetical protein SPBC30B4.01c - fission yeast [Schizosaccharomyces pombe] (fragment)                                                                                                              | 35    | 0.35     |                          |
|                     |                                                                                                                                                                    | ref NP_014536.1     | cell wall integrity and stress response component 3; Wsc3p [Saccharomyces cerevisiae] sp Q12215 WSC3_YEAST Cell wall integrity and stress response component 3 precursor pir  S51892 probable me      | 34    | 0.59     |                          |
|                     |                                                                                                                                                                    | emb CAG84051.1      | unnamed protein product [Yarrowia lipolytica]                                                                                                                                                         | 33    | 1        |                          |
| 1 Zoo I C02 11 06   | 543                                                                                                                                                                | gb FAA39251.1       | GLP_457_13116_11626 [Giardia lamblia ATCC 50803]                                                                                                                                                      | 44    | 0.002    | metabolism               |
|                     |                                                                                                                                                                    | ref NP_965450.1     | hypothetical protein LJ1643 [Lactobacillus johnsonii NCC 533] gb AAS09416.1  hypothetical protein LJ1643 [Lactobacillus johnsonii NCC 533]                                                            | 37    | 0.16     |                          |
|                     |                                                                                                                                                                    | emb CAH03336.1      | Calcium transporting ATPase, putative [Paramecium tetraurelia]                                                                                                                                        | 33    | 2.4      |                          |
|                     |                                                                                                                                                                    | ref NP_705044.1     | hypothetical protein [Plasmodium falciparum 3D7] emb CAD52279.1  hypothetical protein [Plasmodium falciparum 3D7]                                                                                     | 33    | 4        |                          |
|                     |                                                                                                                                                                    | db BAC39011.1       | unnamed protein product [Mus musculus]                                                                                                                                                                | 32    | 5.3      |                          |
|                     |                                                                                                                                                                    | db BAA76856.2       | KIAA1012 protein [Homo sapiens]                                                                                                                                                                       | 32    | 5.3      |                          |
|                     |                                                                                                                                                                    | emb CAG08186.1      | unnamed protein product [Tetraodon nigroviridis]                                                                                                                                                      | 32    | 5.3      |                          |
|                     |                                                                                                                                                                    | gb AAH72296.1       | Unknown (protein for MGC:82500) [Xenopus laevis]                                                                                                                                                      | 32    | 5.3      |                          |
|                     |                                                                                                                                                                    | sp Q9Y2L5 TR85_HUMA | TRS85 homolog                                                                                                                                                                                         | 32    | 5.3      |                          |
|                     |                                                                                                                                                                    | ref NP_055754.2     | KIAA1012 [Homo sapiens]                                                                                                                                                                               | 32    | 5.3      |                          |
| 1 Zoo II A06 137 02 | 613                                                                                                                                                                | gi 6708335 ab       | putative secreted protein [Ixodes scapularis] 64.3                                                                                                                                                    | 64    | 5.00E-09 | metabolism               |
|                     |                                                                                                                                                                    | ref XP_321129.1     | ENSANGP00000007905 [Anopheles gambiae] gb EAA00963.2  ENSANGP00000007905 [Anopheles gambiae str. PEST]                                                                                                | 39    | 0.075    |                          |
|                     |                                                                                                                                                                    | ref XP_372634.1     | similar to double homeobox protein [Homo sapiens]                                                                                                                                                     | 33    | 0.14     |                          |
|                     |                                                                                                                                                                    | pir IS12206         | hypothetical protein 2 (rRNA external transcribed spacer) - mouse                                                                                                                                     | 36    | 0.63     |                          |
|                     |                                                                                                                                                                    | ref NP_848515.1     | late envelope protein 9 [Homo sapiens]                                                                                                                                                                | 35    | 1.1      |                          |
|                     |                                                                                                                                                                    | ref XP_342070.1     | similar to RIKEN cDNA 2610009I02 [Rattus norvegicus]                                                                                                                                                  | 33    | 4.1      |                          |
|                     |                                                                                                                                                                    | emb CAG06352.1      | unnamed protein product [Tetraodon nigroviridis]                                                                                                                                                      | 33    | 4.1      |                          |
|                     |                                                                                                                                                                    | ref NP_848133.1     | small proline rich-like 4A; late envelope protein 8 [Homo sapiens]                                                                                                                                    | 33    | 5.4      |                          |
|                     |                                                                                                                                                                    | gb AA_87135.1       | monomeric alpha-macroglobulin [Rana catesbeiana]                                                                                                                                                      | 32    | 7        |                          |
|                     |                                                                                                                                                                    | ref NP_051961.1     | gp072L [Rabbit fibroma virus] gb AAF17954.1  gp072L [Rabbit fibroma virus]                                                                                                                            | 32    | 7        |                          |
| pir IT03095         | homeoprotein Sail - fruit fly [Drosophila melanogaster] gb AAB53640.1  mirror [Drosophila melanogaster] gb AAC23943.1  homeoprotein Sail [Drosophila melanogaster] | 32                  | 9.2                                                                                                                                                                                                   |       |          |                          |
| 1 Zoo I A05 33 01   | 532                                                                                                                                                                | ref NP_496167.1     | protein phosphatase family member (2K316) [Caenorhabditis elegans] pir IT22522 phosphoprotein phosphatase (EC 3.1.3.16) 1 F52H3.6 [similarity] - Caenorhabditis elegans emb CAA91326.1  Hypotheti     | 100   | 2.00E-20 | intracellular signalling |
|                     |                                                                                                                                                                    | emb CAE67133.1      | Hypothetical protein CBG12555 [Caenorhabditis briggsae]                                                                                                                                               | 99    | 4.00E-20 |                          |
|                     |                                                                                                                                                                    | gb AAK64283.1       | protein phosphatase [Oryza sativa] dbj BAD22973.1  protein phosphatase [Oryza sativa (japonica cultivar-group)] dbj BAD23102.1  protein phosphatase [Oryza sativa (japonica cultivar-group)]          | 99    | 6.00E-20 |                          |
|                     |                                                                                                                                                                    | ref NP_568625.1     | serine/threonine protein phosphatase PP1 isozyme 7 (TOPP7) [Arabidopsis thaliana] dbj BAA24283.1  protein phosphatase 1 catalytic subunit [Arabidopsis thaliana] dbj BAA97417.1  protein phosphatase  | 99    | 6.00E-20 |                          |
|                     |                                                                                                                                                                    | ref NP_851123.1     | serine/threonine protein phosphatase PP1 isozyme 7 (TOPP7) [Arabidopsis thaliana] sp O82733 PP17_ARATH Serine/threonine protein phosphatase PP1 isozyme 7 gb AAM97129.1  expressed protein [          | 99    | 6.00E-20 |                          |
|                     |                                                                                                                                                                    | ref NP_187209.1     | serine/threonine protein phosphatase, putative [Arabidopsis thaliana] gb AAF26139.1  putative serine/threonine protein phosphatase type one [Arabidopsis thaliana] gb AAQ65155.1  At3g05580 [Arabidop | 99    | 6.00E-20 |                          |
|                     |                                                                                                                                                                    | sp O04857 PP12_TOBA | Serine/threonine protein phosphatase PP1 isozyme 2 pir  T03596 phosphoprotein phosphatase (EC 3.1.3.16) 1 - common tobacco emb CAB07804.1  protein phosphatase type 1 [Nicotiana tabacum]             | 98    | 1.00E-19 |                          |
|                     |                                                                                                                                                                    | sp P22198 PP1_MAIZE | Serine/threonine protein phosphatase PP1 pir  S29317 phosphoprotein phosphatase (EC 3.1.3.16) 1 - maize gb AAA33545.1  protein phosphatase-1 prf  1909338A protein phosphatase 1                      | 97    | 1.00E-19 |                          |
|                     |                                                                                                                                                                    | pir IT09550         | phosphoprotein phosphatase (EC 3.1.3.16) 1, catalytic epsilon chain - alfalfa emb CAA05494.1  protein phosphatase 1, catalytic epsilon subunit [Medicago sativa]                                      | 97    | 1.00E-19 |                          |
|                     |                                                                                                                                                                    | ref NP_908906.1     | putative serine/threonine protein phosphatase [Oryza sativa (japonica cultivar-group)] dbj BAB93408.1  putative serine/threonine protein phosphatase [Oryza sativa (japonica cultivar-group)]         | 97    | 1.00E-19 |                          |
| 1 Zoo I B05 34 03   | 470                                                                                                                                                                | ref XP_404547.1     | PP1_EMENI SERINE/THREONINE PROTEIN PHOSPHATASE PP1 [Aspergillus nidulans FGSC A4] sp P20654 PP1_EMENI Serine/threonine protein phosphatase PP1 pir  A32549 phosphoprotein phos                        | 55    | 4.00E-07 | intracellular signalling |
|                     |                                                                                                                                                                    | ref XP_327775.1     | hypothetical protein ( AF071751) protein phosphatase-Z-like serine/threonine protein phosphatase [Neurospora crassa] gb EAA35800.1  hypothetical protein ( AF071751) protein phosphatase-Z-like se    | 55    | 4.00E-07 |                          |
|                     |                                                                                                                                                                    | gb AAD09995.1       | protein phosphatase-Z-like serine/threonine protein phosphatase [Neurospora crassa] gb AAD09996.1  protein phosphatase-Z-like serine/threonine protein phosphatase [Neurospora crassa]                | 55    | 4.00E-07 |                          |
|                     |                                                                                                                                                                    | ref NP_505733.1     | yeast Glc Seven-like Phosphatase (37.2 kD) (gsp-1) [Caenorhabditis elegans] pir IT21553 phosphoprotein phosphatase (EC 3.1.3.16) 1-beta F29F11.6 [similarity] - Caenorhabditis elegans emb CAA9827    | 55    | 5.00E-07 |                          |
|                     |                                                                                                                                                                    | gb EAA48491.1       | hypothetical protein MG00149.4 [Magnaporthe grisea 70-15]                                                                                                                                             | 55    | 5.00E-07 |                          |
|                     |                                                                                                                                                                    | gb EAL_22523.1      | hypothetical protein CNBB4010 [Cryptococcus neoformans var. neoformans B-3501A]                                                                                                                       | 55    | 7.00E-07 |                          |
|                     |                                                                                                                                                                    | gb FAA57520.1       | hypothetical protein MG10195.4 [Magnaporthe grisea 70-15]                                                                                                                                             | 55    | 7.00E-07 |                          |
|                     |                                                                                                                                                                    | sp P48727 YME1_CAE  | Putative serine/threonine protein phosphatase F56C9.1 in chromosome III pir IT16476 phosphoprotein phosphatase (EC 3.1.3.16) 1-alpha F56C9.1 [similarity] - Caenorhabditis elegans gb AAK18957.1  H   | 54    | 9.00E-07 |                          |
|                     |                                                                                                                                                                    | gb AAR8564.1        | AT31252p [Drosophila melanogaster]                                                                                                                                                                    | 54    | 1.00E-06 |                          |
|                     |                                                                                                                                                                    | ref NP_524947.1     | CG8822-PA [Drosophila melanogaster] gb AAF51146.1  CG8822-PA [Drosophila melanogaster]                                                                                                                | 54    | 1.00E-06 |                          |



Additional file 3: Subtraction library BLAST results top 10. Engine: NCBI. Database: NR.

| Clone             | bp  | ID                   | Homology                                                                                                                                                                                                | Score | E value  | category                 |
|-------------------|-----|----------------------|---------------------------------------------------------------------------------------------------------------------------------------------------------------------------------------------------------|-------|----------|--------------------------|
| 1 Zoo I C10 75 06 | 525 | ref NP_193170.1      | casein kinase I (CK11) [Arabidopsis thaliana] pir C71405 probable casein kinase I - Arabidopsis thaliana emb CAA55395.1  casein kinase I [Arabidopsis thaliana] emb CAB10213.1  casein kinase I [Arabid | 90    | 2,00E-17 | intracellular signalling |
|                   |     | emb CAF63293.1       | Hypothetical protein CBG07674 [Caenorhabditis briggsae]                                                                                                                                                 | 87    | 1,00E-16 |                          |
|                   |     | gb AAP47012.1        | casein kinase I epsilon [Gallus gallus]                                                                                                                                                                 | 87    | 1,00E-16 |                          |
|                   |     | dbi BAB32922.1       | casein kinase1 epsilon-2 [Rattus norvegicus]                                                                                                                                                            | 87    | 1,00E-16 |                          |
|                   |     | dbi BAB03473.1       | casein kinase 1 epsilon-3 [Rattus norvegicus]                                                                                                                                                           | 87    | 1,00E-16 |                          |
|                   |     | ref NP_955877.1      | casein kinase 1, delta; wu:fb50c04 [Danio rerio] gb AAH54583.1  Casein kinase 1, delta [Danio rerio]                                                                                                    | 87    | 1,00E-16 |                          |
|                   |     | pdb 1CKJ A           | Chain A, Casein Kinase I Delta Truncation Mutant Containing Residues 1 - 317 Complex With Bound Tungstate pdb 1CKJ B Chain B, Casein Kinase I Delta Truncation Mutant Containing Residues 1 - 317       | 87    | 1,00E-16 |                          |
|                   |     | emb CAG05944.1       | unnamed protein product [Tetraodon nigroviridis]                                                                                                                                                        | 87    | 1,00E-16 |                          |
|                   |     | ref NP_989089.1      | hypothetical protein MGC75636 [Xenopus tropicalis] gb AAH62487.1  Hypothetical protein MGC75636 [Xenopus tropicalis]                                                                                    | 87    | 1,00E-16 |                          |
|                   |     | ref NP_001884.2      | casein kinase 1, delta isoform 1 [Homo sapiens] sp P48730 KC1D_HUMAN Casein kinase I, delta isoform (CKI-delta) (CKId) gb AAH03558.1  Casein kinase 1, delta, isoform 1 [Homo sapiens] dbj BAC10        | 87    | 1,00E-16 |                          |
| 1 Zoo I C11 83 05 | 547 | ref NP_193170.1      | casein kinase I (CK11) [Arabidopsis thaliana] pir C71405 probable casein kinase I - Arabidopsis thaliana emb CAA55395.1  casein kinase I [Arabidopsis thaliana] emb CAB10213.1  casein kinase I [Arabid | 82    | 8,00E-15 | intracellular signalling |
|                   |     | emb CAA55396.1       | casein kinase I [Arabidopsis thaliana]                                                                                                                                                                  | 77    | 2,00E-13 |                          |
|                   |     | ref NP_188976.1      | casein kinase, putative [Arabidopsis thaliana] dbj BAB02278.1  casein kinase [Arabidopsis thaliana] gb AAL06840.1  AT3g23340/MLM24_21 [Arabidopsis thaliana] gb AAL67096.1  AT3g23340/MLM24_21          | 77    | 2,00E-13 |                          |
|                   |     | dbi BAD21585.1       | putative casein kinase I [Oryza sativa (japonica cultivar-group)]                                                                                                                                       | 76    | 3,00E-13 |                          |
|                   |     | pir E86176           | protein F19P19.10 [imported] - Arabidopsis thaliana gb AAB70431.1  F19P19.10 [Arabidopsis thaliana]                                                                                                     | 75    | 6,00E-13 |                          |
|                   |     | ref NP_171939.1      | casein kinase, putative [Arabidopsis thaliana]                                                                                                                                                          | 75    | 6,00E-13 |                          |
|                   |     | gb AAQ22771.1        | putative casein kinase I [Arabidopsis thaliana]                                                                                                                                                         | 75    | 7,00E-13 |                          |
|                   |     | ref NP_563695.2      | protein kinase (ADK1) [Arabidopsis thaliana] pir B86170 ADK1 [imported] - Arabidopsis thaliana gb AAD10678.1  ADK1 [Arabidopsis thaliana] gb AAL38850.1  putative protein kinase ADK1 [Arabidopsis t    | 74    | 1,00E-12 |                          |
|                   |     | pir A55681           | protein kinase ADK1 - Arabidopsis thaliana gb AAB47968.1  dual specificity kinase 1                                                                                                                     | 74    | 1,00E-12 |                          |
|                   |     | ref XP_395574.1      | similar to Casein kinase 1, delta [Apis mellifera]                                                                                                                                                      | 74    | 2,00E-12 |                          |
| 1 Zoo I C12 91 06 | 545 | ref NP_193170.1      | casein kinase I (CK11) [Arabidopsis thaliana] pir C71405 probable casein kinase I - Arabidopsis thaliana emb CAA55395.1  casein kinase I [Arabidopsis thaliana] emb CAB10213.1  casein kinase I [Arabid | 84    | 2,00E-15 | intracellular signalling |
|                   |     | emb CAA55396.1       | casein kinase I [Arabidopsis thaliana]                                                                                                                                                                  | 79    | 5,00E-14 |                          |
|                   |     | ref NP_188976.1      | casein kinase, putative [Arabidopsis thaliana] dbj BAB02278.1  casein kinase [Arabidopsis thaliana] gb AAL06840.1  AT3g23340/MLM24_21 [Arabidopsis thaliana] gb AAL67096.1  AT3g23340/MLM24_21          | 79    | 5,00E-14 |                          |
|                   |     | dbi BAD21585.1       | putative casein kinase I [Oryza sativa (japonica cultivar-group)]                                                                                                                                       | 78    | 9,00E-14 |                          |
|                   |     | ref NP_171939.1      | casein kinase, putative [Arabidopsis thaliana]                                                                                                                                                          | 77    | 1,00E-13 |                          |
|                   |     | pir E86176           | protein F19P19.10 [imported] - Arabidopsis thaliana gb AAB70431.1  F19P19.10 [Arabidopsis thaliana]                                                                                                     | 77    | 1,00E-13 |                          |
|                   |     | gb AAQ22771.1        | putative casein kinase I [Arabidopsis thaliana]                                                                                                                                                         | 77    | 2,00E-13 |                          |
|                   |     | ref NP_199223.1      | casein kinase, putative [Arabidopsis thaliana] dbj BAB10977.1  casein kinase I [Arabidopsis thaliana]                                                                                                   | 75    | 6,00E-13 |                          |
|                   |     | ref NP_524602.1      | CG2048-PC [Drosophila melanogaster] ref NP_733414.1  CG2048-PA [Drosophila melanogaster] ref NP_733415.1  CG2048-PB [Drosophila melanogaster] gb AAD27857.1  double-time [Drosophila mel                | 75    | 7,00E-13 |                          |
|                   |     | sp Q76324 DCCO DROM  | Discs overgrown protein kinase (Double-time protein) gb AAC39134.1  casein kinase I homolog [Drosophila melanogaster]                                                                                   | 75    | 7,00E-13 |                          |
| 1 Zoo I D02 12 08 | 540 | ref XP_306392.1      | ENSANGP0000000059 [Anopheles gambiae] gb EAA01910.1  ENSANGP0000000059 [Anopheles gambiae str. PEST]                                                                                                    | 95    | 9,00E-19 | intracellular signalling |
|                   |     | ref XP_317893.1      | ENSANGP000000024066 [Anopheles gambiae] gb EAA43798.1  ENSANGP000000024066 [Anopheles gambiae str. PEST]                                                                                                | 95    | 9,00E-19 |                          |
|                   |     | ref XP_317894.1      | ENSANGP00000004936 [Anopheles gambiae] gb EAA12933.1  ENSANGP00000004936 [Anopheles gambiae str. PEST]                                                                                                  | 95    | 9,00E-19 |                          |
|                   |     | ref XP_223273.2      | similar to protein phosphatase with EF-hands-2 [Rattus norvegicus]                                                                                                                                      | 91    | 2,00E-17 |                          |
|                   |     | ref NP_035278.1      | serine/threonine protein phosphatase with EF-hand motifs 2 [Mus musculus] sp O35385 PPE2_MOUSE Serine/threonine protein phosphatase with EF-hands-2 (PPEF-2) gb AAB82798.1  protein phosphatase         | 91    | 2,00E-17 |                          |
|                   |     | ref NP_006230.2      | serine/threonine protein phosphatase with EF-hand motifs 2 isoform a; protein phosphatase with EF hands 2 [Homo sapiens]                                                                                | 90    | 2,00E-17 |                          |
|                   |     | sp Q14830 PPEF2_HUMA | Serine/threonine protein phosphatase with EF-hands-2 (PPEF-2) gb AAB82796.1  protein phosphatase with EF-hands-2 long form [Homo sapiens]                                                               | 90    | 2,00E-17 |                          |
|                   |     | emb CAE69136.1       | Hypothetical protein CBG15166 [Caenorhabditis briggsae]                                                                                                                                                 | 89    | 4,00E-17 |                          |
|                   |     | ref NP_741091.1      | protein Phosphatase with EF hands, homologous to Drosophila retinal degeneration C (80.3 kD) (pef-1) [Caenorhabditis elegans] pir T42239 probable phosphoprotein phosphatase (EC 3.1.3.16) - Caeno      | 89    | 6,00E-17 |                          |
|                   |     | gb AAM22065.1        | Phosphatase with ef hands protein 1, isoform b [Caenorhabditis elegans]                                                                                                                                 | 89    | 6,00E-17 |                          |
| 1 Zoo I D10 76 08 | 446 | ref NP_596317.1      | serine-threonine protein phosphatase pp1-1 [Schizosaccharomyces pombe] sp P13681 PP11_SCHPO Serine/threonine protein phosphatase PP1-1 pir A32550 phosphoprotein phosphatase (EC 3.1.3.16)              | 63    | 1,00E-09 | intracellular signalling |
|                   |     | sp Q9JW86 PP1_NEUCR  | Serine/threonine protein phosphatase PP1 gb AAD47567.1  protein phosphatase-1; PPP1 [Neurospora crassa]                                                                                                 | 62    | 2,00E-09 |                          |
|                   |     | gb AAC05275.1        | serine/threonine protein phosphatase type 1 [Neurospora crassa]                                                                                                                                         | 62    | 2,00E-09 |                          |
|                   |     | ref XP_387409.1      | PP1_NEUCR Serine/threonine protein phosphatase PP1 [Gibberella zeae PH-1] gb EAA77831.1  PP1_NEUCR Serine/threonine protein phosphatase PP1 [Gibberella zeae PH-1]                                      | 62    | 2,00E-09 |                          |
|                   |     | ref XP_322129.1      | SERINE/THREONINE PROTEIN PHOSPHATASE PP1 [Neurospora crassa] gb EAA26918.1  SERINE/THREONINE PROTEIN PHOSPHATASE PP1 [Neurospora crassa]                                                                | 62    | 2,00E-09 |                          |
|                   |     | gb AA152055.1        | protein phosphatase 1 alpha [Drosophila buzzatii]                                                                                                                                                       | 62    | 2,00E-09 |                          |
|                   |     | gb EAA48491.1        | hypothetical protein MG00149.4 [Magnaporthe grisea 70-15]                                                                                                                                               | 62    | 2,00E-09 |                          |
|                   |     | pir IS29310          | phosphoprotein phosphatase (EC 3.1.3.16) - Paramecium tetraurelia gb AAA19173.1  phosphoprotein phosphatase 1 emb CAA47831.1  serine /threonine specific protein phosphatase [Paramecium tetrau         | 62    | 2,00E-09 |                          |
|                   |     | gb AAA19174.1        | phosphoprotein phosphatase 1                                                                                                                                                                            | 62    | 2,00E-09 |                          |
|                   |     | ref XP_402442.1      | hypothetical protein UM04827.1 [Ustilago maydis 521] gb EAK86282.1  hypothetical protein UM04827.1 [Ustilago maydis 521]                                                                                | 62    | 3,00E-09 |                          |
| 1 Zoo I F02 13 10 | 567 | gb EAA48491.1        | hypothetical protein MG00149.4 [Magnaporthe grisea 70-15]                                                                                                                                               | 87    | 2,00E-16 | intracellular signalling |
|                   |     | gb AAR88564.1        | AT31252p [Drosophila melanogaster]                                                                                                                                                                      | 87    | 2,00E-16 |                          |
|                   |     | ref NP_524947.1      | CG8822-PA [Drosophila melanogaster] gb AAF51146.1  CG8822-PA [Drosophila melanogaster]                                                                                                                  | 87    | 2,00E-16 |                          |
|                   |     | ref XP_327775.1      | hypothetical protein ( AF071751) protein phosphatase [Neurospora crassa] gb EAA35800.1  hypothetical protein ( AF071751) protein phosphatase-Z-like se                                                  | 86    | 3,00E-16 |                          |
|                   |     | ref XP_404547.1      | PP1_EMENI SERINE/THREONINE PROTEIN PHOSPHATASE PP1 [Aspergillus nidulans FGSC A4] sp P20654 PP1_EMENI Serine/threonine protein phosphatase PP1 pir A32549 phosphoprotein phos                           | 86    | 6,00E-16 |                          |
|                   |     | sp P48727 YME1_CAFF  | Putative serine/threonine protein phosphatase F56C9.1 in chromosome III pir T16476 phosphoprotein phosphatase (EC 3.1.3.16) 1-alpha F56C9.1 [similarity] - Caenorhabditis elegans gb AAK18957.1  H      | 86    | 6,00E-16 |                          |
|                   |     | ref NP_505733.1      | yeast Glc Seven-like Phosphatase (37.2 kD) (gsp-1) [Caenorhabditis elegans] pir T21553 phosphoprotein phosphatase (EC 3.1.3.16) 1-beta F29F11.6 [similarity] - Caenorhabditis elegans emb CAA9827       | 85    | 8,00E-16 |                          |
|                   |     | emb CAE57617.1       | Hypothetical protein CBG00598 [Caenorhabditis briggsae]                                                                                                                                                 | 85    | 8,00E-16 |                          |
|                   |     | gb EAA57520.1        | hypothetical protein MG10195.4 [Magnaporthe grisea 70-15]                                                                                                                                               | 85    | 1,00E-15 |                          |
|                   |     | pir IS29310          | phosphoprotein phosphatase (EC 3.1.3.16) - Paramecium tetraurelia gb AAA19173.1  phosphoprotein phosphatase 1 emb CAA47831.1  serine /threonine specific protein phosphatase [Paramecium tetrau         | 84    | 1,00E-15 |                          |

Additional file 3: Subtraction library BLAST results top 10. Engine: NCBI. Database: NR.

| Clone               | bp  | ID                  | Homology                                                                                                                                                                                              | Score | E value  | category                 |
|---------------------|-----|---------------------|-------------------------------------------------------------------------------------------------------------------------------------------------------------------------------------------------------|-------|----------|--------------------------|
| I_Zoo_I_E03_21_09   | 555 | emb CAE01426.2      | protein kinase A catalytic subunit 2 [Aspergillus fumigatus]                                                                                                                                          | 85    | 1,00E-15 | intracellular signalling |
|                     |     | ref XP_408854.1     | hypothetical protein AN4717.2 [Aspergillus nidulans FGSC A4] gb EAA60759.1  hypothetical protein AN4717.2 [Aspergillus nidulans FGSC A4]                                                              | 80    | 2,00E-14 |                          |
|                     |     | gb AA57318.1        | serine/threonine protein kinase                                                                                                                                                                       | 73    | 3,00E-12 |                          |
|                     |     | ref XP_402071.1     | hypothetical protein UM04456.1 [Ustilago maydis 521] gb AAA75366.1  vinclozolin resistance protein gb EAK85724.1  hypothetical protein UM04456.1 [Ustilago maydis 521]                                | 73    | 3,00E-12 |                          |
|                     |     | ref XP_449711.1     | unnamed protein product [Candida glabrata] emb CAG62687.1  unnamed protein product [Candida glabrata]                                                                                                 | 72    | 6,00E-12 |                          |
|                     |     | gb EAA338644.1      | GLP_59_15138_16382 [Giardia lamblia ATCC 50803]                                                                                                                                                       | 72    | 6,00E-12 |                          |
|                     |     | sp P54644 KRAC_DICD | RAC-family serine/threonine-protein kinase homolog gb AAA76692.1  rac-alpha serine/threonine kinase homolog                                                                                           | 72    | 6,00E-12 |                          |
|                     |     | gb AAK01549.1       | cAMP-dependent protein kinase catalytic subunit [Toxoplasma gondii]                                                                                                                                   | 71    | 1,00E-11 |                          |
|                     |     | ref NP_005391.1     | protein kinase C, epsilon [Homo sapiens] sp Q02156 KPCE_HUMAN Protein kinase C, epsilon type (nPKC-epsilon) pir S28942 protein kinase C (EC 2.7.1.-) epsilon - human emb CAA46388.1  protein kin      | 70    | 2,00E-11 |                          |
|                     |     | emb CAH03534.1      | Putative kinase, similar to Sgk1 serine/threonine-protein kinase [Paramecium tetraurelia]                                                                                                             | 70    | 2,00E-11 |                          |
| I_Zoo_I_E04_29_10   | 398 | ref NP_496167.1     | protein phosphatase family member (2K316) [Caenorhabditis elegans] pir T22522 phosphoprotein phosphatase (EC 3.1.3.16) 1 F52H3.6 [similarity] - Caenorhabditis elegans emb CAA91326.1  Hypotheti      | 100   | 6,00E-21 | intracellular signalling |
|                     |     | ref NP_187209.1     | serine/threonine protein phosphatase, putative [Arabidopsis thaliana] gb AAF26139.1  putative serine/threonine protein phosphatase type one [Arabidopsis thaliana] gb AAQ65155.1  At3g05580 [Arabidop | 99    | 2,00E-20 |                          |
|                     |     | emb CAE67133.1      | Hypothetical protein CBG12555 [Caenorhabditis briggsae]                                                                                                                                               | 99    | 2,00E-20 |                          |
|                     |     | ref NP_568625.1     | serine/threonine protein phosphatase PP1 isozyme 7 (TOPP7) [Arabidopsis thaliana] dbj BAA24283.1  protein phosphatase 1 catalytic subunit [Arabidopsis thaliana] dbj BAA97417.1  protein phosphatase  | 99    | 2,00E-20 |                          |
|                     |     | gb AAK64283.1       | protein phosphatase [Oryza sativa] dbj BAD22973.1  protein phosphatase [Oryza sativa (japonica cultivar-group)] dbj BAD23102.1  protein phosphatase [Oryza sativa (japonica cultivar-group)]          | 99    | 2,00E-20 |                          |
|                     |     | ref NP_851123.1     | serine/threonine protein phosphatase PP1 isozyme 7 (TOPP7) [Arabidopsis thaliana] sp O82733 PP17_ARATH Serine/threonine protein phosphatase PP1 isozyme 7 gb AAM97129.1  expressed protein [          | 99    | 2,00E-20 |                          |
|                     |     | pir IT09544         | phosphoprotein phosphatase (EC 3.1.3.16), catalytic beta chain - alfalfa emb CAA05491.1  protein phosphatase 1, catalytic beta subunit [Medicago sativa]                                              | 98    | 3,00E-20 |                          |
|                     |     | sp O04857 PP12_TOBA | phosphoprotein phosphatase (EC 3.1.3.16) 1, catalytic epsilon chain - alfalfa emb CAA05494.1  protein phosphatase 1, catalytic epsilon subunit [Medicago sativa]                                      | 98    | 3,00E-20 |                          |
|                     |     | ref NP_908906.1     | Serine/threonine protein phosphatase PP1 isozyme 2 pir T03596 phosphoprotein phosphatase (EC 3.1.3.16) 1 - common tobacco emb CAB07804.1  protein phosphatase type 1 [Nicotiana tabacum]              | 98    | 4,00E-20 |                          |
|                     |     | emb CAG03461.1      | putative serine/threonine protein phosphatase [Oryza sativa (japonica cultivar-group)] dbj BAB93408.1  putative serine/threonine protein phosphatase [Oryza sativa (japonica cultivar-group)]         | 97    | 5,00E-20 |                          |
| I_Zoo_I_G02_15_14   | 489 | emb CAG03461.1      | unnamed protein product [Tetraodon nigroviridis]                                                                                                                                                      | 151   | 4,00E-36 | intracellular signalling |
|                     |     | ref XP_317423.1     | ENSANGP00000011546 [Anopheles gambiae] gb EAA12230.1  ENSANGP00000011546 [Anopheles gambiae str. PEST]                                                                                                | 149   | 2,00E-35 |                          |
|                     |     | emb CAG01116.1      | unnamed protein product [Tetraodon nigroviridis]                                                                                                                                                      | 149   | 2,00E-35 |                          |
|                     |     | gb AAQ81631.1       | protein kinase A [Rattus norvegicus]                                                                                                                                                                  | 149   | 2,00E-35 |                          |
|                     |     | sp Q8M_J44 KAPA_CAN | cAMP-dependent protein kinase, alpha-catalytic subunit (PKA C-alpha) gb AAM88381.1  protein kinase A alpha [Canis familiaris]                                                                         | 149   | 2,00E-35 |                          |
|                     |     | pdb 1CTPIE          | Chain E, Camp-Dependent Protein Kinase (E.C.2.7.1.37) (Capk) (Catalytic Subunit)                                                                                                                      | 149   | 2,00E-35 |                          |
|                     |     | pdb 2CPKIE          | Chain E, c-AMP-Dependent Protein Kinase (E.C.2.7.1.37) (cAPK) (Catalytic Subunit) pdb 1ATPIE Chain E, c-AMP-Dependent Protein Kinase (E.C.2.7.1.37) (cAPK) (Catalytic Subunit) Complex With The       | 149   | 2,00E-35 |                          |
|                     |     | pdb 1CMKIE          | Chain E, Camp-Dependent Protein Kinase Catalytic Subunit (E.C.2.7.1.37) pdb 1CDKA Chain A, Camp-Dependent Protein Kinase Catalytic Subunit (E.C.2.7.1.37) (Protein Kinase A) Complexed With Pr        | 149   | 2,00E-35 |                          |
|                     |     | ref NP_997401.1     | cAMP-dependent protein kinase catalytic subunit alpha isoform 2; protein kinase A catalytic subunit; PKA C-alpha [Homo sapiens]                                                                       | 149   | 2,00E-35 |                          |
|                     |     | gb AAF76424.1       | sperm cAMP-dependent protein kinase catalytic subunit Cs [Ovis aries]                                                                                                                                 | 149   | 2,00E-35 |                          |
| I_Zoo_I_H05_40_15   | 402 | ref NP_496167.1     | protein phosphatase family member (2K316) [Caenorhabditis elegans] pir T22522 phosphoprotein phosphatase (EC 3.1.3.16) 1 F52H3.6 [similarity] - Caenorhabditis elegans emb CAA91326.1  Hypotheti      | 100   | 6,00E-21 | intracellular signalling |
|                     |     | emb CAE67133.1      | Hypothetical protein CBG12555 [Caenorhabditis briggsae]                                                                                                                                               | 99    | 2,00E-20 |                          |
|                     |     | ref NP_187209.1     | serine/threonine protein phosphatase, putative [Arabidopsis thaliana] gb AAF26139.1  putative serine/threonine protein phosphatase type one [Arabidopsis thaliana] gb AAQ65155.1  At3g05580 [Arabidop | 99    | 2,00E-20 |                          |
|                     |     | ref NP_568625.1     | serine/threonine protein phosphatase PP1 isozyme 7 (TOPP7) [Arabidopsis thaliana] dbj BAA24283.1  protein phosphatase 1 catalytic subunit [Arabidopsis thaliana] dbj BAA97417.1  protein phosphatase  | 99    | 2,00E-20 |                          |
|                     |     | ref NP_851123.1     | serine/threonine protein phosphatase PP1 isozyme 7 (TOPP7) [Arabidopsis thaliana] sp O82733 PP17_ARATH Serine/threonine protein phosphatase PP1 isozyme 7 gb AAM97129.1  expressed protein [          | 99    | 2,00E-20 |                          |
|                     |     | gb AAK64283.1       | protein phosphatase [Oryza sativa] dbj BAD22973.1  protein phosphatase [Oryza sativa (japonica cultivar-group)] dbj BAD23102.1  protein phosphatase [Oryza sativa (japonica cultivar-group)]          | 99    | 2,00E-20 |                          |
|                     |     | emb CAC85302.1      | putative serine/threonine protein phosphatase [Trypanosoma cruzi]                                                                                                                                     | 98    | 4,00E-20 |                          |
|                     |     | sp O04857 PP12_TOBA | Serine/threonine protein phosphatase PP1 isozyme 2 pir T03596 phosphoprotein phosphatase (EC 3.1.3.16) 1 - common tobacco emb CAB07804.1  protein phosphatase type 1 [Nicotiana tabacum]              | 98    | 4,00E-20 |                          |
|                     |     | pir IT09544         | phosphoprotein phosphatase (EC 3.1.3.16), catalytic beta chain - alfalfa emb CAA05491.1  protein phosphatase 1, catalytic beta subunit [Medicago sativa]                                              | 97    | 5,00E-20 |                          |
|                     |     | pir IT09550         | phosphoprotein phosphatase (EC 3.1.3.16) 1, catalytic epsilon chain - alfalfa emb CAA05494.1  protein phosphatase 1, catalytic epsilon subunit [Medicago sativa]                                      | 97    | 5,00E-20 |                          |
| I_Zoo_I_H06_48_16   | 552 | ref XP_233723.2     | similar to hypothetical protein FLJ36119 [Rattus norvegicus]                                                                                                                                          | 53    | 4,00E-06 | intracellular signalling |
|                     |     | ref NP_701337.1     | hypothetical protein [Plasmodium falciparum 3D7] gb AAN36061.1  hypothetical protein [Plasmodium falciparum 3D7]                                                                                      | 46    | 4,00E-04 |                          |
|                     |     | db BAC85781.1       | unnamed protein product [Homo sapiens]                                                                                                                                                                | 46    | 5,00E-04 |                          |
|                     |     | ref XP_340624.1     | tubulin-tyrosine ligase, putative [Trypanosoma brucei] gb AAQ15983.1  tubulin-tyrosine ligase, putative [Trypanosoma brucei]                                                                          | 45    | 6,00E-04 |                          |
|                     |     | pir E88575          | protein ZK1128.6 [imported] - Caenorhabditis elegans                                                                                                                                                  | 45    | 6,00E-04 |                          |
|                     |     | ref NP_499251.2     | tubulin-tyrosine ligase (69.1 kD) (3L221) [Caenorhabditis elegans] emb CAA87425.3  Hypothetical protein ZK1128.6 [Caenorhabditis elegans]                                                             | 45    | 6,00E-04 |                          |
|                     |     | pir IT27699         | hypothetical protein ZK1128.6 - Caenorhabditis elegans                                                                                                                                                | 45    | 6,00E-04 |                          |
|                     |     | gb EAA21855.1       | Tubulin-tyrosine ligase family, putative [Plasmodium yoelii yoelii]                                                                                                                                   | 45    | 0,001    |                          |
|                     |     | ref XP_195428.2     | similar to dJ366N23.3 (NYD-TSPG protein) [Mus musculus]                                                                                                                                               | 44    | 0,002    |                          |
|                     |     | emb CAG01732.1      | unnamed protein product [Tetraodon nigroviridis]                                                                                                                                                      | 42    | 0,007    |                          |
| I_Zoo_II_A03_113_01 | 481 | pir IT29290         | phosphoprotein phosphatase (EC 3.1.3.16) C34D4.2 [similarity] - Caenorhabditis elegans                                                                                                                | 56    | 2,00E-07 | intracellular signalling |
|                     |     | ref NP_501125.1     | protein phosphatase 1 catalytic family member (4H921) [Caenorhabditis elegans] gb AAB00704.2  Hypothetical protein C34D4.2 [Caenorhabditis elegans]                                                   | 56    | 2,00E-07 |                          |
|                     |     | ref NP_506574.1     | protein phosphatase family member (5O909) [Caenorhabditis elegans] pir T21288 phosphoprotein phosphatase (EC 3.1.3.16) F23B12.1 [similarity] - Caenorhabditis elegans emb CAB01164.1  Hypotheti       | 55    | 4,00E-07 |                          |
|                     |     | emb CAE67810.1      | Hypothetical protein CBG13388 [Caenorhabditis briggsae]                                                                                                                                               | 54    | 1,00E-06 |                          |
|                     |     | emb CAA76756.1      | serine-threonine protein phosphatase [Drosophila melanogaster]                                                                                                                                        | 53    | 2,00E-06 |                          |
|                     |     | ref NP_477384.1     | CG3245-PA [Drosophila melanogaster] gb AAF46772.1  CG3245-PA [Drosophila melanogaster]                                                                                                                | 53    | 2,00E-06 |                          |
|                     |     | ref NP_727418.1     | CG2096-PA [Drosophila melanogaster] gb AAL39192.1  GH05039p [Drosophila melanogaster] gb AAF46582.2  CG2096-PA [Drosophila melanogaster]                                                              | 53    | 3,00E-06 |                          |
|                     |     | gb AAMI1400.1       | RE17877p [Drosophila melanogaster]                                                                                                                                                                    | 53    | 3,00E-06 |                          |
|                     |     | ref NP_524738.1     | CG2096-PB [Drosophila melanogaster] sp P48462 PP1B_DROME Serine/threonine protein phosphatase beta isoform (Flap wing protein) pir S13828 phosphoprotein phosphatase (EC 3.1.3.16) 1-beta ca          | 53    | 3,00E-06 |                          |
|                     |     | gb AAMI1075.1       | GH20565p [Drosophila melanogaster]                                                                                                                                                                    | 52    | 4,00E-06 |                          |

Additional file 3: Subtraction library BLAST results top 10. Engine: NCBI. Database: NR.

| Clone               | bp                                                                                                                                                                                                       | ID                  | Homology                                                                                                                                                                                          | Score           | E value                                                                                                                                                                               | category |
|---------------------|----------------------------------------------------------------------------------------------------------------------------------------------------------------------------------------------------------|---------------------|---------------------------------------------------------------------------------------------------------------------------------------------------------------------------------------------------|-----------------|---------------------------------------------------------------------------------------------------------------------------------------------------------------------------------------|----------|
| I_Zoo I F08 61 10   | 605                                                                                                                                                                                                      | ref XP_315833.1     | ENSANGP00000004457 [Anopheles gambiae] gb EAA10801.2  ENSANGP00000004457 [Anopheles gambiae str. PEST]                                                                                            | 60              | 4.00E-08                                                                                                                                                                              | other    |
|                     |                                                                                                                                                                                                          | gb FAI_19732.1      | hypothetical protein CNBG3600 [Cryptococcus neoformans var. neoformans B-3501A]                                                                                                                   | 59              | 9.00E-08                                                                                                                                                                              |          |
|                     |                                                                                                                                                                                                          | emb CAD11404.1      | hypothetical protein [Neurospora crassa]                                                                                                                                                          | 57              | 2.00E-07                                                                                                                                                                              |          |
|                     |                                                                                                                                                                                                          | ref XP_323510.1     | hypothetical protein [Neurospora crassa] gb EAA31492.1  hypothetical protein [Neurospora crassa]                                                                                                  | 57              | 2.00E-07                                                                                                                                                                              |          |
|                     |                                                                                                                                                                                                          | ref XP_322125.1     | hypothetical protein [Neurospora crassa] gb EAA26914.1  hypothetical protein [Neurospora crassa]                                                                                                  | 57              | 3.00E-07                                                                                                                                                                              |          |
|                     |                                                                                                                                                                                                          | ref XP_390611.1     | hypothetical protein FG10435.1 [Gibberella zeae PH-1] gb EAA68209.1  hypothetical protein FG10435.1 [Gibberella zeae PH-1]                                                                        | 55              | 1.00E-06                                                                                                                                                                              |          |
|                     |                                                                                                                                                                                                          | ref NP_647705.1     | CG32300-PB [Drosophila melanogaster] gb AAF47625.1  CG32300-PB [Drosophila melanogaster] gb AAL39805.1  LD43716P [Drosophila melanogaster] emb CAD23246.1  peptide O-xylosyltransferase           | 55              | 1.00E-06                                                                                                                                                                              |          |
|                     |                                                                                                                                                                                                          | ref XP_385939.1     | hypothetical protein FG05763.1 [Gibberella zeae PH-1] gb EAA75838.1  hypothetical protein FG05763.1 [Gibberella zeae PH-1]                                                                        | 55              | 1.00E-06                                                                                                                                                                              |          |
|                     |                                                                                                                                                                                                          | ref XP_322395.1     | hypothetical protein [Neurospora crassa] gb EAA28544.1  hypothetical protein [Neurospora crassa]                                                                                                  | 54              | 2.00E-06                                                                                                                                                                              |          |
|                     |                                                                                                                                                                                                          | gb EAA50002.1       | hypothetical protein MG03761.4 [Magnaporthe grisea 70-15]                                                                                                                                         | 54              | 2.00E-06                                                                                                                                                                              |          |
|                     |                                                                                                                                                                                                          | I_Zoo II B02_106 04 | 429                                                                                                                                                                                               | ref NP_780670.1 | RIKEN cDNA C030014K22 gene [Mus musculus] dbj BAC33132.1  unnamed protein product [Mus musculus]                                                                                      |          |
| dbj BAC28491.1      | unnamed protein product [Mus musculus]                                                                                                                                                                   |                     |                                                                                                                                                                                                   | 68              | 3.00E-11                                                                                                                                                                              |          |
| ref XP_097622.4     | similar to RIKEN cDNA C030014K22 gene [Homo sapiens]                                                                                                                                                     |                     |                                                                                                                                                                                                   | 68              | 3.00E-11                                                                                                                                                                              |          |
| emb CAF97569.1      | unnamed protein product [Tetraodon nigroviridis]                                                                                                                                                         |                     |                                                                                                                                                                                                   | 59              | 3.00E-08                                                                                                                                                                              |          |
| emb CAF95856.1      | unnamed protein product [Tetraodon nigroviridis]                                                                                                                                                         |                     |                                                                                                                                                                                                   | 57              | 8.00E-08                                                                                                                                                                              |          |
| emb CAF95189.1      | unnamed protein product [Tetraodon nigroviridis]                                                                                                                                                         |                     |                                                                                                                                                                                                   | 56              | 1.00E-07                                                                                                                                                                              |          |
| gb AAH29924.2       | C9orf59 protein [Homo sapiens]                                                                                                                                                                           |                     |                                                                                                                                                                                                   | 55              | 2.00E-07                                                                                                                                                                              |          |
| ref NP_203745.1     | chromosome 9 open reading frame 59 [Homo sapiens] gb AAH49388.1  Chromosome 9 open reading frame 59 [Homo sapiens]                                                                                       |                     |                                                                                                                                                                                                   | 55              | 2.00E-07                                                                                                                                                                              |          |
| dbj BAB15724.1      | FLJ00024 protein [Homo sapiens]                                                                                                                                                                          |                     |                                                                                                                                                                                                   | 55              | 2.00E-07                                                                                                                                                                              |          |
| ref NP_780720.1     | RIKEN cDNA A130092J06 gene [Mus musculus] dbj BAC37667.1  unnamed protein product [Mus musculus]                                                                                                         |                     |                                                                                                                                                                                                   | 55              | 2.00E-07                                                                                                                                                                              |          |
| I_Zoo I HI2 96 16   | 574                                                                                                                                                                                                      |                     |                                                                                                                                                                                                   | emb CAF97569.1  | unnamed protein product [Tetraodon nigroviridis]                                                                                                                                      | 49       |
|                     |                                                                                                                                                                                                          | emb CAF95856.1      | unnamed protein product [Tetraodon nigroviridis]                                                                                                                                                  | 49              | 8.00E-05                                                                                                                                                                              |          |
|                     |                                                                                                                                                                                                          | ref NP_780720.1     | RIKEN cDNA A130092J06 gene [Mus musculus] dbj BAC37667.1  unnamed protein product [Mus musculus]                                                                                                  | 48              | 1.00E-04                                                                                                                                                                              |          |
|                     |                                                                                                                                                                                                          | ref XP_097622.4     | similar to RIKEN cDNA C030014K22 gene [Homo sapiens]                                                                                                                                              | 48              | 1.00E-04                                                                                                                                                                              |          |
|                     |                                                                                                                                                                                                          | ref NP_203745.1     | chromosome 9 open reading frame 59 [Homo sapiens] gb AAH49388.1  Chromosome 9 open reading frame 59 [Homo sapiens]                                                                                | 48              | 1.00E-04                                                                                                                                                                              |          |
|                     |                                                                                                                                                                                                          | ref NP_780670.1     | RIKEN cDNA C030014K22 gene [Mus musculus] dbj BAC33132.1  unnamed protein product [Mus musculus]                                                                                                  | 46              | 5.00E-04                                                                                                                                                                              |          |
|                     |                                                                                                                                                                                                          | ref NP_705944.1     | epha4b; Eph receptor a4b; eph-like receptor tyrosine kinase 2 [Danio rerio] gb AAK54725.1  Eph receptor EphA4b [Danio rerio]                                                                      | 33              | 2.7                                                                                                                                                                                   |          |
|                     |                                                                                                                                                                                                          | gb AAH75486.1       | Unknown (protein for MGC:89323) [Xenopus tropicalis]                                                                                                                                              | 33              | 4.6                                                                                                                                                                                   |          |
|                     |                                                                                                                                                                                                          | ref NP_592936.1     | GATA-type transcription factor family protein Gaf2p [Schizosaccharomyces pombe] sp Q10134 FEP1_SCHPO Iron-sensing transcription factor 1 (Transcription factor gaf2) (Gaf-2) pir T38291 GATA-type | 32              | 6                                                                                                                                                                                     |          |
|                     |                                                                                                                                                                                                          | pir T43298          | transcription factor gaf2 - fission yeast (Schizosaccharomyces pombe) gb AAB38022.1  homologous to GATA-binding transcription factor [Schizosaccharomyces pombe]                                  | 32              | 6                                                                                                                                                                                     |          |
|                     |                                                                                                                                                                                                          | I_Zoo II F05 134 11 | 414                                                                                                                                                                                               | gb AAP36485.1   | Homo sapiens sulfotransferase family, cytosolic, 1C, member 1 [synthetic construct]                                                                                                   | 97       |
| ref NP_001047.1     | sulfotransferase family, cytosolic, 1C, member 1 isoform a; sulfotransferase 1C1 [Homo sapiens] sp O00338 S1C1_HUMAN Sulfotransferase 1C1 (SULT1C#1) (ST1C2) (humSULTC2) gb AAC51285.1  su               |                     |                                                                                                                                                                                                   | 97              | 9.00E-20                                                                                                                                                                              |          |
| ref NP_789795.1     | sulfotransferase family, cytosolic, 1C, member 1 isoform b; sulfotransferase 1C1 [Homo sapiens] gb AAF72802.1  sulfotransferase 1C1 [Homo sapiens] gb AAF72803.1  sulfotransferase 1C1 [Homo sapiens]    |                     |                                                                                                                                                                                                   | 97              | 9.00E-20                                                                                                                                                                              |          |
| ref NP_803454.1     | sulfotransferase, estrogen-preferring [Bos taurus] sp P19217 SUOE_BOVIN Estrogen sulfotransferase (Sulfotransferase, estrogen-preferring) (ST1E1) pir S29045 estrone sulfotransferase (EC 2.8.2.4) - t   |                     |                                                                                                                                                                                                   | 97              | 9.00E-20                                                                                                                                                                              |          |
| ref NP_081211.3     | sulfotransferase family, cytosolic, 1C, member 1 [Mus musculus] sp Q9D939 SUC1_MOUSE Sulfotransferase 1C1 dbj BAB25002.1  unnamed protein product [Mus musculus] gb AAG00823.1  sulfotransf              |                     |                                                                                                                                                                                                   | 96              | 2.00E-19                                                                                                                                                                              |          |
| gb AAH22665.1       | Sulfotransferase family, cytosolic, 1C, member 1 [Mus musculus]                                                                                                                                          |                     |                                                                                                                                                                                                   | 96              | 2.00E-19                                                                                                                                                                              |          |
| pir JC7283          | hydroxyarylamine sulfotransferase (EC 2.8.2.-) 2A - rat                                                                                                                                                  |                     |                                                                                                                                                                                                   | 92              | 2.00E-18                                                                                                                                                                              |          |
| sp Q9WUW8 STK1_RAT  | Sulfotransferase K1 (rSULT1C2) pir JC7282 hydroxyarylamine sulfotransferase (EC 2.8.2.-) 2 - rat emb CAB41460.1  sulfotransferase K1 [Rattus norvegicus]                                                 |                     |                                                                                                                                                                                                   | 92              | 2.00E-18                                                                                                                                                                              |          |
| ref XP_236811.1     | similar to Sulfotransferase K1 (rSULT1C2) [Rattus norvegicus]                                                                                                                                            |                     |                                                                                                                                                                                                   | 92              | 3.00E-18                                                                                                                                                                              |          |
| gb AAF86583.1       | sulfotransferase ST1B2 [Canis familiaris]                                                                                                                                                                |                     |                                                                                                                                                                                                   | 91              | 4.00E-18                                                                                                                                                                              |          |
| I_Zoo II F06 142 12 | 221                                                                                                                                                                                                      |                     |                                                                                                                                                                                                   | emb CAF92700.1  | unnamed protein product [Tetraodon nigroviridis]                                                                                                                                      | 62       |
|                     |                                                                                                                                                                                                          | emb CAB72286.1      | EG:BACR25B3.1 [Drosophila melanogaster]                                                                                                                                                           | 61              | 7.00E-09                                                                                                                                                                              |          |
|                     |                                                                                                                                                                                                          | ref NP_524643.2     | CG7981-PA [Drosophila melanogaster] gb AAF45786.3  CG7981-PA [Drosophila melanogaster]                                                                                                            | 61              | 7.00E-09                                                                                                                                                                              |          |
|                     |                                                                                                                                                                                                          | ref NP_726815.1     | CG7981-PD [Drosophila melanogaster] emb CAD31650.1  perlecan [Drosophila melanogaster] gb AAN09079.1  CG7981-PD [Drosophila melanogaster]                                                         | 61              | 7.00E-09                                                                                                                                                                              |          |
|                     |                                                                                                                                                                                                          | ref NP_726814.1     | CG7981-PE [Drosophila melanogaster] gb AAN09078.1  CG7981-PE [Drosophila melanogaster]                                                                                                            | 61              | 7.00E-09                                                                                                                                                                              |          |
|                     |                                                                                                                                                                                                          | ref NP_726816.1     | CG7981-PB [Drosophila melanogaster] gb AAN09080.1  CG7981-PB [Drosophila melanogaster]                                                                                                            | 61              | 7.00E-09                                                                                                                                                                              |          |
|                     |                                                                                                                                                                                                          | ref NP_726813.1     | CG7981-PC [Drosophila melanogaster] gb AAN09077.1  CG7981-PC [Drosophila melanogaster]                                                                                                            | 61              | 7.00E-09                                                                                                                                                                              |          |
|                     |                                                                                                                                                                                                          | emb CAG12052.1      | unnamed protein product [Tetraodon nigroviridis]                                                                                                                                                  | 60              | 9.00E-09                                                                                                                                                                              |          |
|                     |                                                                                                                                                                                                          | emb CAG09045.1      | unnamed protein product [Tetraodon nigroviridis]                                                                                                                                                  | 60              | 1.00E-08                                                                                                                                                                              |          |
|                     |                                                                                                                                                                                                          | ref XP_235261.2     | similar to RIKEN cDNA C82005L12 [Rattus norvegicus]                                                                                                                                               | 59              | 2.00E-08                                                                                                                                                                              |          |
|                     |                                                                                                                                                                                                          | I_Zoo II H05 136 15 | 413                                                                                                                                                                                               | ref NP_187850.1 | extensin family protein [Arabidopsis thaliana] gb AAG51010.1  hypothetical protein; 75534-7E595 [Arabidopsis thaliana] dbj BAB03151.1  unnamed protein product [Arabidopsis thaliana] | 47       |
| ref XP_372890.1     | hypothetical protein XP_377699 [Homo sapiens]                                                                                                                                                            |                     |                                                                                                                                                                                                   | 46              | 2.00E-04                                                                                                                                                                              |          |
| ref XP_358745.1     | hypothetical protein XP_358745 [Mus musculus]                                                                                                                                                            |                     |                                                                                                                                                                                                   | 46              | 2.00E-04                                                                                                                                                                              |          |
| gb AAR36900.1       | newborn larvae-specific serine protease SS2-1 [Trichinella spiralis]                                                                                                                                     |                     |                                                                                                                                                                                                   | 46              | 2.00E-04                                                                                                                                                                              |          |
| gb AAK16520.1       | newborn larvae-specific serine protease SS2 [Trichinella spiralis]                                                                                                                                       |                     |                                                                                                                                                                                                   | 46              | 2.00E-04                                                                                                                                                                              |          |
| ref NP_898392.1     | conserved hypothetical protein [Synecococcus sp. WH 8102] emb CAE08818.1  conserved hypothetical protein [Synecococcus sp. WH 8102]                                                                      |                     |                                                                                                                                                                                                   | 42              | 0.003                                                                                                                                                                                 |          |
| ref NP_776304.1     | coagulation factor V (proaccelerin, labile factor) [Bos taurus] sp Q28107 FA5_BOVIN Coagulation factor V precursor (Activated protein C cofactor) pir KFBO5 coagulation factor V precursor - bovine gb A |                     |                                                                                                                                                                                                   | 41              | 0.005                                                                                                                                                                                 |          |
| ref NP_075004.1     | hypothetical protein AsioCp44 [Euglena longa] sp P58151 YCXC_ASTLO Hypothetical 51.9 kDa protein in rps4-rps11 intergenic region (ORF426) emb CAC24615.1  hypothetical protein [Euglena longa]           |                     |                                                                                                                                                                                                   | 41              | 0.005                                                                                                                                                                                 |          |
| gb AAA30513.1       | factor V                                                                                                                                                                                                 |                     |                                                                                                                                                                                                   | 41              | 0.005                                                                                                                                                                                 |          |
| ref NP_486802.1     | unknown protein [Nostoc sp. PCC 7120] pir AC2126 hypothetical protein alr2562 [imported] - Nostoc sp. (strain PCC 7120) dbj BAB74261.1  ORF_ID:alr2562-unknown protein [Nostoc sp. PCC 7120]             |                     |                                                                                                                                                                                                   | 40              | 0.008                                                                                                                                                                                 |          |



Additional file 3: Subtraction library BLAST results top 10. Engine: NCBI. Database: NR.

| Clone               | bp  | ID                   | Homology                                                                                                                                                                                                      | Score | E value | category |
|---------------------|-----|----------------------|---------------------------------------------------------------------------------------------------------------------------------------------------------------------------------------------------------------|-------|---------|----------|
| 1 Zoo II G04 127 14 | 552 | ref NP_009614.2      | Ubiquitin-specific protease that specifically disassembles unanchored ubiquitin chains; involved in fructose-1,6-bisphosphatase (FBPase) degradation; Ubp14p [Saccharomyces cerevisiae]                       | 35    | 0,65    | other*   |
|                     |     | sp P38237 UBPPE_YEAS | Ubiquitin carboxyl-terminal hydrolase 14 (Ubiquitin thiolesterase 14) (Ubiquitin-specific processing protease 14) (Deubiquitinating enzyme 14) pir  S45916 hypothetical protein YBR058c - yeast (Saccharo     | 35    | 0,65    |          |
|                     |     | ref NP_700710.1      | hypothetical protein [Plasmodium falciparum 3D7] gb AAN35434.1  hypothetical protein [Plasmodium falciparum 3D7]                                                                                              | 33    | 4,2     |          |
|                     |     | ref NP_473088.1      | hypothetical protein [Plasmodium falciparum 3D7] pir  D71606 hypothetical protein PFB0800c - malaria parasite (Plasmodium falciparum) gb AAC71949.1  hypothetical protein PFB0800c [Plasmodium falc           | 32    | 7,2     |          |
|                     |     | gb AAA81668.1        | ATPase subunit 6                                                                                                                                                                                              | 32    | 7,2     |          |
|                     |     | ref NP_701989.1      | hypothetical protein [Plasmodium falciparum 3D7] gb AAN36713.1  hypothetical protein [Plasmodium falciparum 3D7]                                                                                              | 32    | 9,5     |          |
|                     |     | ref NP_703411.1      | hypothetical protein [Plasmodium falciparum 3D7] emb CAD51431.1  hypothetical protein [Plasmodium falciparum 3D7]                                                                                             | 32    | 9,5     |          |
| 1 Zoo II H02 112 16 | 410 | ref NP_736406.1      | Unknown [Streptococcus agalactiae NEM316] emb CAD47632.1  Unknown [Streptococcus agalactiae NEM316]                                                                                                           | 35    | 0,42    | other*   |
|                     |     | ref NP_485240.1      | unknown protein [Nostoc sp. PCC 7120] pir  AB1956 hypothetical protein alr1197 [imported] - Nostoc sp. (strain PCC 7120) dbj BAB73154.1  ORF_ID:alr1197--unknown protein [Nostoc sp. PCC 7120]                | 32    | 2,1     |          |
|                     |     | emb CAG85200.1       | unnamed protein product [Debaryomyces hansenii]                                                                                                                                                               | 32    | 2,1     |          |
|                     |     | gb AAM81963.1        | DNA polymerase I-like protein B [Trypanosoma brucei]                                                                                                                                                          | 32    | 2,1     |          |
|                     |     | ref NP_985645.1      | AFR098Wp [Erethothecium gossypii] gb AAS53469.1  AFR098Wp [Erethothecium gossypii]                                                                                                                            | 32    | 2,7     |          |
|                     |     | gb AAM73861.1        | putative serine/threonine protein kinase; HcSTK [Haemonchus contortus]                                                                                                                                        | 32    | 3,6     |          |
|                     |     | gb AAM73859.1        | putative serine/threonine protein kinase; HcSTK [Haemonchus contortus]                                                                                                                                        | 32    | 3,6     |          |
|                     |     | gb AAM73862.1        | putative serine/threonine protein kinase; HcSTK [Haemonchus contortus]                                                                                                                                        | 32    | 3,6     |          |
|                     |     | gb AAM73860.1        | putative serine/threonine protein kinase; HcSTK [Haemonchus contortus]                                                                                                                                        | 32    | 3,6     |          |
|                     |     | ref ZP_00159980.1    | COG0541: Signal recognition particle GTPase [Anabaena variabilis ATCC 29413]                                                                                                                                  | 32    | 3,6     |          |
| 1 Zoo II H06 144 16 | 501 | sp Q9FH83 WR52_ARAB  | Probable WRKY transcription factor 52 (WRKY DNA-binding protein 52) (Disease resistance protein RRS1) (Resistance to Ralstonia solanacearum 1 protein)                                                        | 35    | 0,66    | other*   |
|                     |     | ref NP_199339.1      | disease resistance protein (TIR-NBS-LRR class), putative [Arabidopsis thaliana] dbj BAB10247.1  disease resistance protein-like [Arabidopsis thaliana]                                                        | 35    | 0,66    |          |
|                     |     | dbj BAC41834.1       | putative disease resistance protein [Arabidopsis thaliana]                                                                                                                                                    | 35    | 0,66    |          |
|                     |     | ref NP_955021.1      | PHD finger protein 16 [Mus musculus] tp CAE30499.1  TPA: Jade3 protein [Mus musculus]                                                                                                                         | 34    | 1,5     |          |
|                     |     | dbj BAC97901.1       | mKIAA0215 protein [Mus musculus]                                                                                                                                                                              | 34    | 1,5     |          |
|                     |     | ref XP_325400.1      | hypothetical protein [Neurospora crassa] gb EAA31271.1  hypothetical protein [Neurospora crassa]                                                                                                              | 33    | 1,9     |          |
|                     |     | emb CAG80597.1       | unnamed protein product [Yarrowia lipolytica]                                                                                                                                                                 | 33    | 1,9     |          |
|                     |     | ref XP_326769.1      | hypothetical protein [Neurospora crassa] gb EAA31518.1  hypothetical protein [Neurospora crassa] emb CAE76117.1  related to N-acetyltransferase [Neurospora crassa]                                           | 33    | 2,5     |          |
| 1 Zoo I A09 65 01   | 567 | ref NP_912801.1      | conserved hypothetical protein [Listeria monocytogenes str. 4b F2365] gb AAT02892.1  conserved hypothetical protein [Listeria monocytogenes str. 4b F2365]                                                    | 33    | 2,5     |          |
|                     |     | ref NP_188233.1      | conserved hypothetical protein [Listeria monocytogenes str. 4b H7858] gb EAL10165.1  conserved hypothetical protein [Listeria monocytogenes str. 4b H7858]                                                    | 33    | 2,5     |          |
|                     |     | ref NP_194466.2      | unnamed protein product [Oryza sativa (japonica cultivar-group)] dbj BAA85215.1  unnamed protein product [Oryza sativa (japonica cultivar-group)]                                                             | 37    | 0,18    | other*   |
|                     |     | ref NP_188233.1      | unnamed protein product [Yarrowia lipolytica]                                                                                                                                                                 | 37    | 0,18    |          |
|                     |     | gb AAD41627.1        | dynein light chain 2 [Schistosoma japonicum] gb AAD41629.1  dynein light chain 4 [Schistosoma japonicum]                                                                                                      | 37    | 0,24    |          |
|                     |     | emb CAG84363.1       | unnamed protein product [Debaryomyces hansenii]                                                                                                                                                               | 37    | 0,31    |          |
|                     |     | ref NP_194466.2      | dynein light chain, putative [Arabidopsis thaliana] gb AAL36091.1  unknown protein [Arabidopsis thaliana] gb AAM20341.1  unknown protein [Arabidopsis thaliana]                                               | 36    | 0,53    |          |
|                     |     | ref NP_188233.1      | dynein light chain, putative [Arabidopsis thaliana] dbj BAB02678.1  unnamed protein product [Arabidopsis thaliana] gb AAM63499.1  putative dynein light chain protein [Arabidopsis thaliana]                  | 36    | 0,53    |          |
| 1 Zoo I A11 81 01   | 279 | ref NP_594368.1      | dynein light chain [Schizosaccharomyces pombe] sp Q9UR05 DYL1_SCHPO Dynein light chain 1, cytoplasmic pir  T39205 dynein light chain - fission yeast (Schizosaccharomyces pombe) emb CAB5415                  | 36    | 0,53    |          |
|                     |     | ref NP_984289.1      | hypothetical protein M4122.170 - Arabidopsis thaliana emb CAA19730.1  putative protein [Arabidopsis thaliana] emb CAB79591.1  putative protein [Arabidopsis thaliana]                                         | 36    | 0,53    |          |
|                     |     | ref NP_175635.1      | ADR193Wp [Erethothecium gossypii] gb AAS52113.1  ADR193Wp [Erethothecium gossypii]                                                                                                                            | 35    | 0,69    |          |
|                     |     | ref NP_175635.1      | dynein light chain type 1 family protein [Arabidopsis thaliana] pir  E96562 unknown protein, 73838-74229 [imported] - Arabidopsis thaliana gb AAF29412.1  dynein light chain, putative [Arabidopsis thaliana] | 35    | 0,69    |          |
|                     |     | dbj BAD19631.1       | hypothetical protein [Oryza sativa (japonica cultivar-group)]                                                                                                                                                 | 35    | 0,39    | other*   |
|                     |     | emb CAA11051.1       | immunoglobulin heavy chain [Acipenser baerii]                                                                                                                                                                 | 32    | 3,3     |          |
|                     |     | emb CAE69531.1       | Hypothetical protein CBG15740 [Caenorhabditis briggsae]                                                                                                                                                       | 31    | 5,6     |          |
|                     |     | emb CAA73713.1       | immunoglobulin heavy chain [Acipenser baerii]                                                                                                                                                                 | 31    | 7,3     |          |
| 1 Zoo I A12 89 02   | 317 | ref NP_593798.1      | hypothetical protein [imported] - Microbacterium ammoniaphilum (fragment) emb CAA55649.1  unknown [Microbacterium ammoniaphilum]                                                                              | 31    | 7,3     |          |
|                     |     | ref NP_593798.1      | immunoglobulin heavy chain [Acipenser baerii]                                                                                                                                                                 | 30    | 9,6     |          |
|                     |     | ref NP_593798.1      | WD repeat protein, possible mitotic checkpoint [Schizosaccharomyces pombe] pir  T38301 probable mitotic checkpoint WD repeat protein - fission yeast (Schizosaccharomyces pombe) emb CAB16243.1               | 35    | 0,28    | other*   |
|                     |     | ref XP_341238.1      | similar to toll-associated serine protease [Rattus norvegicus]                                                                                                                                                | 34    | 0,82    |          |
|                     |     | ref NP_037078.1      | extracellular matrix protein 2 [Rattus norvegicus] sp P24054 SPL1_RAT SPARC-like protein 1 precursor (Matrix glycoprotein Sc1) pir  GERTX1 matrix glycoprotein SC1 precursor - rat gb AAA68708.1  SC          | 34    | 0,82    |          |
|                     |     | ref XP_357292.1      | similar to 60S ribosomal protein L23a [Mus musculus]                                                                                                                                                          | 32    | 4,1     |          |
|                     |     | ref NP_652526.1      | CG3576-PB [Drosophila melanogaster] ref NP_727075.1  CG3576-PA [Drosophila melanogaster] gb AAL28803.1  LD18904p [Drosophila melanogaster] gb AAL57756.1  longevity protein [Drosophila mela                  | 32    | 4,1     |          |
|                     |     | ref XP_234397.2      | similar to 60S ribosomal protein L23a [Rattus norvegicus]                                                                                                                                                     | 31    | 5,3     |          |
| 1 Zoo I A12 89 02   | 317 | ref XP_195305.2      | similar to 60S ribosomal protein L23a [Mus musculus]                                                                                                                                                          | 31    | 5,3     |          |
|                     |     | ref NP_116803.1      | MS115, putative beta-agarase precursor [Microscilla sp. PRE1] gb AAK62837.1  MS115, putative beta-agarase precursor [Microscilla sp. PRE1]                                                                    | 31    | 5,3     |          |
|                     |     | emb CAC37287.1       | C367G8.3 (novel protein similar to RPL23A (60S ribosomal protein L23A)) [Homo sapiens] gb AAK61228.1  60S ribosomal protein L23A like [Homo sapiens]                                                          | 31    | 7       |          |
|                     |     | ref XP_312609.1      | ENSANGP0000001289 [Anopheles gambiae] gb EAA08227.1  ENSANGP0000001289 [Anopheles gambiae str. PEST]                                                                                                          | 31    | 7       |          |
|                     |     | ref XP_312609.1      |                                                                                                                                                                                                               | 31    | 7       |          |

Additional file 3: Subtraction library BLAST results top 10. Engine: NCBI. Database: NR.

| Clone             | bp  | ID                                  | Homology                                                                                                                                                                                             | Score | E value | category |
|-------------------|-----|-------------------------------------|------------------------------------------------------------------------------------------------------------------------------------------------------------------------------------------------------|-------|---------|----------|
| 1 Zoo I B04 26 04 | 454 | <a href="#">gb FAI_23322.1</a>      | hypothetical protein CNBA4380 [Cryptococcus neoformans var. neoformans B-3501A]                                                                                                                      | 36    | 0,18    | other*   |
|                   |     | <a href="#">ref NP_077341.1</a>     | 5-hydroxytryptamine (serotonin) receptor 6 [Rattus norvegicus] sp P31388 5H6_RAT 5-hydroxytryptamine 6 receptor (5-HT-6) (Serotonin receptor 6) (ST-B17) pir JN0591 serotonin receptor 6 - rat gb AA | 33    | 1,5     |          |
|                   |     | <a href="#">gb FAI_19732.1</a>      | hypothetical protein CNBG3600 [Cryptococcus neoformans var. neoformans B-3501A]                                                                                                                      | 32    | 2       |          |
|                   |     | <a href="#">gb EAA46797.1</a>       | hypothetical protein MG10491.4 [Magnaporthe grisea 70-15]                                                                                                                                            | 32    | 2,6     |          |
|                   |     | <a href="#">ref NP_955369.1</a>     | similar to RIKEN cDNA 1810059G22 [Homo sapiens] gb AAH51355.1  Similar to RIKEN cDNA 1810059G22 [Homo sapiens]                                                                                       | 32    | 2,6     |          |
|                   |     | <a href="#">ref XP_134707.2</a>     | RIKEN cDNA 4921509F24 [Mus musculus]                                                                                                                                                                 | 32    | 2,6     |          |
|                   |     | <a href="#">db BAB29584.1</a>       | unnamed protein product [Mus musculus]                                                                                                                                                               | 32    | 2,6     |          |
|                   |     | <a href="#">emb CAG06428.1</a>      | unnamed protein product [Tetraodon nigroviridis]                                                                                                                                                     | 32    | 3,4     |          |
|                   |     | <a href="#">db BAB14975.1</a>       | unnamed protein product [Homo sapiens]                                                                                                                                                               | 32    | 3,4     |          |
|                   |     | <a href="#">ref ZP_00304902.1</a>   | COG0318: Acyl-CoA synthetases (AMP-forming)/AMP-acid ligases II [Novosphingobium aromaticivorans DSM 12444]                                                                                          | 32    | 3,4     |          |
| 1 Zoo I B07 50 03 | 320 | <a href="#">ref XP_320743.1</a>     | ENSANGP00000020029 [Anopheles gambiae] gb EAA00362.1  ENSANGP00000020029 [Anopheles gambiae str. PEST]                                                                                               | 34    | 0,82    | other*   |
|                   |     | <a href="#">emb CAE74414.1</a>      | Hypothetical protein CBG22146 [Caenorhabditis briggsae]                                                                                                                                              | 33    | 1,1     |          |
|                   |     | <a href="#">gb EAA41880.1</a>       | GLP_158_68817_64606 [Giardia lamblia ATCC 50803]                                                                                                                                                     | 33    | 1,8     |          |
|                   |     | <a href="#">ref NP_375057.1</a>     | enterotoxin P [Staphylococcus aureus subsp. aureus N315] ref NP_835571.1  enterotoxin P [Staphylococcus phage phiN315] pir C89984 enterotoxin P [imported] - Staphylococcus aureus (strain N315) d   | 32    | 2,4     |          |
|                   |     | <a href="#">prf I1704203A</a>       | enterotoxin A                                                                                                                                                                                        | 32    | 2,4     |          |
|                   |     | <a href="#">db BAC87286.1</a>       | unnamed protein product [Homo sapiens]                                                                                                                                                               | 32    | 3,1     |          |
|                   |     | <a href="#">gb EAA42869.1</a>       | GLP_574_135852_134011 [Giardia lamblia ATCC 50803]                                                                                                                                                   | 31    | 5,3     |          |
|                   |     | <a href="#">ref NP_293990.1</a>     | conserved hypothetical protein [Deinococcus radiodurans R1] pir ID75540 conserved hypothetical protein - Deinococcus radiodurans (strain R1) gb AAF09850.1  conserved hypothetical protein [Deinococ | 31    | 5,3     |          |
|                   |     | <a href="#">sp Q9XY92 SPEE_DICD</a> | Spermidine synthase (Putrescine aminopropyltransferase) (SPDSY) gb AAD32851.1  spermidine synthase [Dictyostelium discoideum]                                                                        | 31    | 6,9     |          |
|                   |     | <a href="#">sp P79703 JUNB_CYPG</a> | Transcription factor jun-B gb AAB39939.1  junB transcription factor [Cyprinus carpio]                                                                                                                | 31    | 6,9     |          |
| 1 Zoo I B08 58 04 | 315 | <a href="#">emb CAE66895.1</a>      | Hypothetical protein CBG12393 [Caenorhabditis briggsae]                                                                                                                                              | 37    | 0,13    | other*   |
|                   |     | <a href="#">ref NP_001002186.1</a>  | zgc:91880 [Danio rerio] gb AAH74038.1  Unknown (protein for MGC:91880) [Danio rerio]                                                                                                                 | 36    | 0,22    |          |
|                   |     | <a href="#">gb AAM09300.1</a>       | CC chemokine with stalk CK2 [Onchocerca mykiss]                                                                                                                                                      | 35    | 0,37    |          |
|                   |     | <a href="#">emb CAG02436.1</a>      | unnamed protein product [Tetraodon nigroviridis]                                                                                                                                                     | 34    | 0,63    |          |
|                   |     | <a href="#">emb CAG13131.1</a>      | unnamed protein product [Tetraodon nigroviridis]                                                                                                                                                     | 34    | 0,83    |          |
|                   |     | <a href="#">ref NP_694438.1</a>     | putative replication protein E1 [Reindeer papillomavirus] gb AAN09917.1  putative replication protein E1 [reindeer papillomavirus]                                                                   | 33    | 1,1     |          |
|                   |     | <a href="#">gb EAA15185.1</a>       | nucleotide-binding protein [Plasmodium yoelii yoelii]                                                                                                                                                | 33    | 1,1     |          |
|                   |     | <a href="#">pir I172544</a>         | hypothetical protein F53B6.1 - Caenorhabditis elegans                                                                                                                                                | 33    | 1,4     |          |
|                   |     | <a href="#">ref NP_492404.1</a>     | tetraspanin family member (tsp-15) [Caenorhabditis elegans] emb CAB03120.2  C. elegans TSP-15 protein (corresponding sequence F53B6.1) [Caenorhabditis elegans]                                      | 33    | 1,4     |          |
|                   |     | <a href="#">ref XP_314330.1</a>     | ENSANGP00000012724 [Anopheles gambiae] gb EAA09730.1  ENSANGP00000012724 [Anopheles gambiae str. PEST]                                                                                               | 33    | 1,4     |          |
| 1 Zoo I C08 59 06 | 452 | <a href="#">db BAD25060.1</a>       | putative zinc-binding protein [Orzyza sativa (japonica cultivar-group)]                                                                                                                              | 35    | 0,4     | other*   |
|                   |     | <a href="#">ref NP_990301.1</a>     | cation-independent mannose-6-phosphate receptor [Gallus gallus] pir I50726 cation-independent mannose-6-phosphate receptor - chicken gb AAC59718.1  cation-independent mannose-6-phosphate rec       | 33    | 1,2     |          |
|                   |     | <a href="#">ref XP_452462.1</a>     | unnamed protein product [Kluyveromyces lactis] sp O59863 PLB_KLULA Lysophospholipase precursor (Phospholipase B) (KIPLB) db JBA28619.1  phospholipase B [Kluyveromyces lactis] emb CAH013            | 33    | 1,5     |          |
|                   |     | <a href="#">ref XP_396698.1</a>     | similar to CG9281-PB [Apis mellifera]                                                                                                                                                                | 33    | 1,5     |          |
|                   |     | <a href="#">gb AAK95906.1</a>       | polymerase [Influenza B virus (B/Shangdong/7/97)]                                                                                                                                                    | 31    | 4,4     |          |
|                   |     | <a href="#">gb AAM19148.1</a>       | envelope glycoprotein [Crimean-Congo hemorrhagic fever virus]                                                                                                                                        | 31    | 4,4     |          |
|                   |     | <a href="#">gb AAK94481.1</a>       | envelope glycoprotein [Crimean-Congo hemorrhagic fever virus]                                                                                                                                        | 31    | 4,4     |          |
|                   |     | <a href="#">gb AAK94477.1</a>       | envelope glycoprotein [Crimean-Congo hemorrhagic fever virus] gb AAM19152.1  envelope glycoprotein [Crimean-Congo hemorrhagic fever virus]                                                           | 31    | 4,4     |          |
|                   |     | <a href="#">gb AAK94480.1</a>       | envelope glycoprotein [Crimean-Congo hemorrhagic fever virus] gb AAM19150.1  envelope glycoprotein [Crimean-Congo hemorrhagic fever virus]                                                           | 31    | 4,4     |          |
|                   |     | <a href="#">gb AAF06861.1</a>       | polymerase [Influenza B virus (B/Beijing/184/93)]                                                                                                                                                    | 31    | 4,4     |          |
| 1 Zoo I D11 84 07 | 552 | <a href="#">emb CAG83560.1</a>      | unnamed protein product [Yarrowia lipolytica]                                                                                                                                                        | 36    | 0,5     | other*   |
|                   |     | <a href="#">emb CAF89910.1</a>      | unnamed protein product [Tetraodon nigroviridis]                                                                                                                                                     | 32    | 5,5     |          |
|                   |     | <a href="#">emb CAF92278.1</a>      | unnamed protein product [Tetraodon nigroviridis]                                                                                                                                                     | 32    | 5,5     |          |
|                   |     | <a href="#">ref NP_281993.1</a>     | putative integral membrane protein [Campylobacter jejuni subsp. jejuni NCTC 11168] pir H81355 probable integral membrane protein Cj0832c [imported] - Campylobacter jejuni (strain NCTC 11168) emb   | 32    | 7,2     |          |
|                   |     | <a href="#">ref XP_396525.1</a>     | similar to Dosage compensation regulator (Male-less protein) (No action potential protein) [Apis mellifera]                                                                                          | 32    | 9,5     |          |
| 1 Zoo I E07 53 09 | 576 | <a href="#">ref XP_223090.2</a>     | similar to Kif21b [Rattus norvegicus]                                                                                                                                                                | 37    | 0,32    | other*   |
|                   |     | <a href="#">ref XP_371332.1</a>     | kinesin family member 21B [Homo sapiens]                                                                                                                                                             | 35    | 1,2     |          |
|                   |     | <a href="#">ref NP_505184.1</a>     | reverse transcriptase RNase H-like protein family member (51956) [Caenorhabditis elegans] pir T32228 hypothetical protein T23B12.9 - Caenorhabditis elegans gb AAB69941.1  Hypothetical protein T23E | 34    | 2,1     |          |
|                   |     | <a href="#">db BAB01254.1</a>       | centromere protein [Arabidopsis thaliana]                                                                                                                                                            | 33    | 2,7     |          |
|                   |     | <a href="#">ref NP_188918.1</a>     | kinase interacting family protein [Arabidopsis thaliana]                                                                                                                                             | 33    | 2,7     |          |
|                   |     | <a href="#">gb EAK94874.1</a>       | hypothetical protein CaO19.9845 [Candida albicans SC5314]                                                                                                                                            | 33    | 3,6     |          |
|                   |     | <a href="#">gb EAK94815.1</a>       | hypothetical protein CaO19.2309 [Candida albicans SC5314]                                                                                                                                            | 33    | 3,6     |          |
|                   |     | <a href="#">gb EAL18878.1</a>       | hypothetical protein CNB11390 [Cryptococcus neoformans var. neoformans B-3501A]                                                                                                                      | 33    | 4,7     |          |
|                   |     | <a href="#">ref NP_473182.1</a>     | hypothetical protein, conserved [Plasmodium falciparum 3D7] emb CAB39005.1  hypothetical protein, conserved [Plasmodium falciparum 3D7]                                                              | 32    | 8       |          |
|                   |     | <a href="#">ref NP_296903.1</a>     | conserved hypothetical protein [Chlamydia muridarum] pir C81693 conserved hypothetical protein TC0526 [imported] - Chlamydia muridarum (strain Nigg) gb AAF39368.1  conserved hypothetical protein   | 32    | 8       |          |
| 1 Zoo I F08 62 12 | 398 | <a href="#">ref XP_355968.1</a>     | RIKEN cDNA 8030491N06 [Mus musculus]                                                                                                                                                                 | 33    | 0,96    | other*   |
|                   |     | <a href="#">ref XP_219126.2</a>     | similar to FLJ00251 protein [Rattus norvegicus]                                                                                                                                                      | 32    | 2,8     |          |
|                   |     | <a href="#">ref NP_393807.1</a>     | amylopullulanase related protein [Thermoplasma acidophilum DSM 1728] emb CAC11276.1  amylopullulanase related protein [Thermoplasma acidophilum]                                                     | 31    | 6,2     |          |
|                   |     | <a href="#">ref NP_702453.1</a>     | hypothetical protein, conserved [Plasmodium falciparum 3D7] gb AAN37177.1  hypothetical protein, conserved [Plasmodium falciparum 3D7]                                                               | 30    | 8,1     |          |

Additional file 3: Subtraction library BLAST results top 10. Engine: NCBI. Database: NR.

| Clone               | bp                                                                                                                                           | ID                   | Homology                                                                                                                                                                                                                                                                         | Score           | E value                                                                                                                                                                                                                            | category |      |        |
|---------------------|----------------------------------------------------------------------------------------------------------------------------------------------|----------------------|----------------------------------------------------------------------------------------------------------------------------------------------------------------------------------------------------------------------------------------------------------------------------------|-----------------|------------------------------------------------------------------------------------------------------------------------------------------------------------------------------------------------------------------------------------|----------|------|--------|
| 1 Zoo I G06 47 14   | 653                                                                                                                                          | ref NP_325899.1      | conserved hypothetical protein [Mycoplasma pulmonis UAB CTIP] pir  D90520 conserved hypothetical protein MYPU_0680 [imported] - Mycoplasma pulmonis (strain UAB CTIP) emb CAC13241.1  conserved                                                                                  | 36              | 0,73                                                                                                                                                                                                                               | other*   |      |        |
|                     |                                                                                                                                              | gb FAK87323.1        | hypothetical protein containing a signal peptide and low complexity repeats, member of cryptosporidium SKSR gene family, telomeric localized gene [Cryptosporidium parvum]                                                                                                       | 35              | 0,95                                                                                                                                                                                                                               |          |      |        |
|                     |                                                                                                                                              | gb AAFO4793.1        | structural polyprotein [Eastern equine encephalitis virus]                                                                                                                                                                                                                       | 34              | 2,1                                                                                                                                                                                                                                |          |      |        |
|                     |                                                                                                                                              | ref ZP_00040252.1    | COG3210: Large exoproteins involved in heme utilization or adhesion [Xylella fastidiosa Ann-1]                                                                                                                                                                                   | 33              | 3,6                                                                                                                                                                                                                                |          |      |        |
|                     |                                                                                                                                              | ref NP_008734.1      | NADH dehydrogenase subunit 4 [Smithornis sharpei] pir  T11189 NADH2 dehydrogenase (ubiquinone) (EC 1.6.5.3) chain 4 - Smithornis sharpei mitochondrion gb AAD32523.1  NADH dehydrogenase subunit 4 [Drosophila melanogaster] gb AAF46470.2  CG32704-PA [Drosophila melanogaster] | 33              | 6,2                                                                                                                                                                                                                                |          |      |        |
|                     |                                                                                                                                              | ref NP_272328.1      | CG32704-PA [Drosophila melanogaster] gb AAF46470.2  CG32704-PA [Drosophila melanogaster]                                                                                                                                                                                         | 32              | 8,1                                                                                                                                                                                                                                |          |      |        |
|                     |                                                                                                                                              | sp P08768 P01_S_FEEV | Structural polyprotein (P130) [Contains: Coat protein C (Capsid protein C); Spike glycoprotein E3; Spike glycoprotein E2; 6 kDa peptide; Spike glycoprotein E1] pir  VHVVEE structural polyprotein - easter                                                                      | 32              | 8,1                                                                                                                                                                                                                                |          |      |        |
|                     |                                                                                                                                              | ref ZP_00038092.1    | COG3210: Large exoproteins involved in heme utilization or adhesion [Xylella fastidiosa Dixon]                                                                                                                                                                                   | 32              | 8,1                                                                                                                                                                                                                                |          |      |        |
|                     |                                                                                                                                              | 1 Zoo I G09 71 13    | 577                                                                                                                                                                                                                                                                              | ref XP_223090.2 | similar to Kif21b [Rattus norvegicus]                                                                                                                                                                                              | 35       | 0,94 | other* |
|                     |                                                                                                                                              |                      |                                                                                                                                                                                                                                                                                  | ref NP_505184.1 | reverse transcriptase RNase H-like protein family member (51956) [Caenorhabditis elegans] pir  T32228 hypothetical protein T23B12.9 - Caenorhabditis elegans gb AAB69941.1  Hypothetical protein T23B12.9 [Caenorhabditis elegans] | 34       | 2,1  |        |
| ref ZP_00236583.1   | conserved hypothetical protein protein [Bacillus cereus G9241] gb EAL15859.1  conserved hypothetical protein protein [Bacillus cereus G9241] |                      |                                                                                                                                                                                                                                                                                  | 33              | 3,6                                                                                                                                                                                                                                |          |      |        |
| ref XP_371332.1     | kinesin family member 21B [Homo sapiens]                                                                                                     |                      |                                                                                                                                                                                                                                                                                  | 33              | 3,6                                                                                                                                                                                                                                |          |      |        |
| gb EAK94874.1       | hypothetical protein CaO19.9845 [Candida albicans SC5314]                                                                                    |                      |                                                                                                                                                                                                                                                                                  | 33              | 3,6                                                                                                                                                                                                                                |          |      |        |
| gb EAK94815.1       | hypothetical protein CaO19.2309 [Candida albicans SC5314]                                                                                    |                      |                                                                                                                                                                                                                                                                                  | 33              | 3,6                                                                                                                                                                                                                                |          |      |        |
| emb CAB62997.1      | dJ180M12.1 (KIAA0645) [Homo sapiens]                                                                                                         |                      |                                                                                                                                                                                                                                                                                  | 32              | 8                                                                                                                                                                                                                                  |          |      |        |
| ref NP_978201.1     | conserved hypothetical protein [Bacillus cereus ATCC 10987] gb AAS40809.1  conserved hypothetical protein [Bacillus cereus ATCC 10987]       |                      |                                                                                                                                                                                                                                                                                  | 32              | 8                                                                                                                                                                                                                                  |          |      |        |
| db BAA31620.2       | KIAA0645 protein [Homo sapiens]                                                                                                              |                      |                                                                                                                                                                                                                                                                                  | 32              | 8                                                                                                                                                                                                                                  |          |      |        |
| ref XP_376007.1     | KIAA0645 gene product [Homo sapiens] sp O75140 DEP5_HUMAN DEP domain containing protein 5 pir  T00376 KIAA0645 protein - human               |                      |                                                                                                                                                                                                                                                                                  | 32              | 8                                                                                                                                                                                                                                  |          |      |        |
| 1 Zoo I H08 64 16   | 511                                                                                                                                          | ref NP_404035.1      | conserved hypothetical protein [Yersinia pestis] ref NP_671090.1  hypothetical [Yersinia pestis KIM] ref NP_995064.1  conserved hypothetical protein [Yersinia pestis biovar Medievalis str. 91001] pir  AC010901                                                                | 35              | 0,69                                                                                                                                                                                                                               | other*   |      |        |
|                     |                                                                                                                                              | emb CAD61269.1       | Sl:zC214P16.5 (novel protein similar to human RAB3 GTPase-activating protein (RAB3GAP)) [Danio rerio]                                                                                                                                                                            | 35              | 0,9                                                                                                                                                                                                                                |          |      |        |
|                     |                                                                                                                                              | ref ZP_00129398.1    | hypothetical protein [Desulfovibrio desulfuricans G20]                                                                                                                                                                                                                           | 34              | 1,2                                                                                                                                                                                                                                |          |      |        |
|                     |                                                                                                                                              | ref ZP_00295462.1    | COG1357: Uncharacterized low-complexity proteins [Methanosarcina barkeri str. fusaro]                                                                                                                                                                                            | 33              | 2                                                                                                                                                                                                                                  |          |      |        |
|                     |                                                                                                                                              | ref XP_394083.1      | similar to ENSANGP00000011733 [Apis mellifera]                                                                                                                                                                                                                                   | 33              | 2                                                                                                                                                                                                                                  |          |      |        |
|                     |                                                                                                                                              | ref XP_403694.1      | hypothetical protein UM06079.1 [Ustilago maydis 521] gb EAK86902.1  hypothetical protein UM06079.1 [Ustilago maydis 521]                                                                                                                                                         | 33              | 3,4                                                                                                                                                                                                                                |          |      |        |
|                     |                                                                                                                                              | gb AAC02666.1        | polyprotein [Arabidopsis thaliana]                                                                                                                                                                                                                                               | 32              | 4,5                                                                                                                                                                                                                                |          |      |        |
|                     |                                                                                                                                              | gb AAC02664.1        | polyprotein [Arabidopsis thaliana]                                                                                                                                                                                                                                               | 32              | 4,5                                                                                                                                                                                                                                |          |      |        |
|                     |                                                                                                                                              | gb AAC02669.1        | polyprotein [Arabidopsis thaliana]                                                                                                                                                                                                                                               | 32              | 4,5                                                                                                                                                                                                                                |          |      |        |
|                     |                                                                                                                                              | ref ZP_00220227.1    | COG1674: DNA segregation ATPase FtsK/SpoIIIE and related proteins [Burkholderia cepacia R1808]                                                                                                                                                                                   | 32              | 4,5                                                                                                                                                                                                                                |          |      |        |
| 1 Zoo I H11 88 15   | 549                                                                                                                                          | emb CAG13731.1       | unnamed protein product [Tetraodon nigroviridis]                                                                                                                                                                                                                                 | 36              | 0,49                                                                                                                                                                                                                               | other*   |      |        |
|                     |                                                                                                                                              | ref NP_774312.1      | bl 7672 [Bradyrhizobium japonicum USDA 110] db BAC52937.1  bl 7672 [Bradyrhizobium japonicum USDA 110]                                                                                                                                                                           | 35              | 0,84                                                                                                                                                                                                                               |          |      |        |
|                     |                                                                                                                                              | ref NP_648240.3      | CG32355-PA [Drosophila melanogaster] gb AAL28576.1  HL05638p [Drosophila melanogaster] gb AAN12010.2  CG32355-PA [Drosophila melanogaster]                                                                                                                                       | 34              | 1,9                                                                                                                                                                                                                                |          |      |        |
|                     |                                                                                                                                              | gb AAM29365.1        | HL08076p [Drosophila melanogaster]                                                                                                                                                                                                                                               | 34              | 1,9                                                                                                                                                                                                                                |          |      |        |
|                     |                                                                                                                                              | ref ZP_00039879.1    | COG0557: Exoribonuclease R [Xylella fastidiosa Dixon]                                                                                                                                                                                                                            | 33              | 2,4                                                                                                                                                                                                                                |          |      |        |
|                     |                                                                                                                                              | ref NP_643105.1      | conserved hypothetical protein [Xanthomonas axonopodis pv. citri str. 306] gb AAM37641.1  conserved hypothetical protein [Xanthomonas axonopodis pv. citri str. 306]                                                                                                             | 33              | 3,2                                                                                                                                                                                                                                |          |      |        |
|                     |                                                                                                                                              | ref NP_779039.1      | truncated ribonuclease R [Xylella fastidiosa Temecula1] gb AAO28688.1  truncated ribonuclease R [Xylella fastidiosa Temecula1]                                                                                                                                                   | 33              | 3,2                                                                                                                                                                                                                                |          |      |        |
|                     |                                                                                                                                              | gb AAB96954.1        | unknown [Mycobacterium bovis BCG]                                                                                                                                                                                                                                                | 33              | 3,2                                                                                                                                                                                                                                |          |      |        |
|                     |                                                                                                                                              | ref ZP_00041828.1    | COG0557: Exoribonuclease R [Xylella fastidiosa Ann-1]                                                                                                                                                                                                                            | 33              | 3,2                                                                                                                                                                                                                                |          |      |        |
|                     |                                                                                                                                              | ref NP_049591.1      | haem lyase [Tetrahymena pyriformis] gb AAD41936.1  haem lyase [Tetrahymena pyriformis]                                                                                                                                                                                           | 33              | 4,2                                                                                                                                                                                                                                |          |      |        |
| 1 Zoo II C02 107 06 | 407                                                                                                                                          | gb EAL_23390.1       | hypothetical protein CNBA0400 [Cryptococcus neoformans var. neoformans B-3501A]                                                                                                                                                                                                  | 36              | 0,15                                                                                                                                                                                                                               | other*   |      |        |
|                     |                                                                                                                                              | ref NP_003610.1      | neurotrypsin precursor; brain-specific serine protease 3; leydin [Homo sapiens] sp P56730 NETR_HUMAN Neurotrypsin precursor (Motopsin) (Leydin) emb CAA04816.1  neurotrypsin [Homo sapiens]                                                                                      | 36              | 0,19                                                                                                                                                                                                                               |          |      |        |
|                     |                                                                                                                                              | ref ZP_00185615.2    | hypothetical protein Rxy 023183 [Rubrobacter xylanophilus DSM 9941]                                                                                                                                                                                                              | 34              | 0,56                                                                                                                                                                                                                               |          |      |        |
|                     |                                                                                                                                              | gb AAC26795.1        | M protein [Streptococcus pyogenes]                                                                                                                                                                                                                                               | 33              | 0,95                                                                                                                                                                                                                               |          |      |        |
|                     |                                                                                                                                              | ref ZP_00226586.1    | COG0569: K+ transport systems, NAD-binding component [Kineococcus radiotolerans SRS30216]                                                                                                                                                                                        | 33              | 0,95                                                                                                                                                                                                                               |          |      |        |
|                     |                                                                                                                                              | gb AAN46661.1        | M protein precursor [Streptococcus pyogenes]                                                                                                                                                                                                                                     | 33              | 1,2                                                                                                                                                                                                                                |          |      |        |
|                     |                                                                                                                                              | ref ZP_00228209.1    | hypothetical protein Krad06001650 [Kineococcus radiotolerans SRS30216]                                                                                                                                                                                                           | 33              | 1,6                                                                                                                                                                                                                                |          |      |        |
|                     |                                                                                                                                              | ref NP_701981.1      | hypothetical protein [Plasmodium falciparum 3D7] gb AAN36705.1  hypothetical protein [Plasmodium falciparum 3D7]                                                                                                                                                                 | 33              | 1,6                                                                                                                                                                                                                                |          |      |        |
|                     |                                                                                                                                              | gb AAP73846.1        | hypothetical protein [Oryza sativa (japonica cultivar-group)]                                                                                                                                                                                                                    | 33              | 1,6                                                                                                                                                                                                                                |          |      |        |
|                     |                                                                                                                                              | gb AAH43850.1        | MGC53673 protein [Xenopus laevis]                                                                                                                                                                                                                                                | 32              | 2,1                                                                                                                                                                                                                                |          |      |        |
| 1 Zoo II F03 118 11 | 511                                                                                                                                          | emb CAG13047.1       | unnamed protein product [Tetraodon nigroviridis]                                                                                                                                                                                                                                 | 37              | 0,24                                                                                                                                                                                                                               | other*   |      |        |
|                     |                                                                                                                                              | gb AAT41732.1        | At5g27860 [Arabidopsis thaliana]                                                                                                                                                                                                                                                 | 35              | 0,9                                                                                                                                                                                                                                |          |      |        |
|                     |                                                                                                                                              | db BAC03505.1        | unnamed protein product [Homo sapiens]                                                                                                                                                                                                                                           | 33              | 2,6                                                                                                                                                                                                                                |          |      |        |
|                     |                                                                                                                                              | ref XP_410487.1      | hypothetical protein AN6350.2 [Aspergillus nidulans FGSC A4] gb EAA58734.1  hypothetical protein AN6350.2 [Aspergillus nidulans FGSC A4]                                                                                                                                         | 33              | 3,4                                                                                                                                                                                                                                |          |      |        |
|                     |                                                                                                                                              | ref XP_410086.1      | hypothetical protein AN5949.2 [Aspergillus nidulans FGSC A4] gb EAA57812.1  hypothetical protein AN5949.2 [Aspergillus nidulans FGSC A4]                                                                                                                                         | 32              | 5,8                                                                                                                                                                                                                                |          |      |        |
|                     |                                                                                                                                              | db BAA95483.1        | Kielin [Xenopus laevis]                                                                                                                                                                                                                                                          | 32              | 7,6                                                                                                                                                                                                                                |          |      |        |
|                     |                                                                                                                                              | emb CAG00254.1       | unnamed protein product [Tetraodon nigroviridis]                                                                                                                                                                                                                                 | 32              | 7,6                                                                                                                                                                                                                                |          |      |        |
|                     |                                                                                                                                              | emb CAF87357.1       | unnamed protein product [Tetraodon nigroviridis]                                                                                                                                                                                                                                 | 32              | 7,6                                                                                                                                                                                                                                |          |      |        |
|                     |                                                                                                                                              | ref XP_327045.1      | predicted protein [Neurospora crassa] emb CAD70387.1  hypothetical protein [Neurospora crassa] gb EAA34295.1  predicted protein [Neurospora crassa]                                                                                                                              | 32              | 7,6                                                                                                                                                                                                                                |          |      |        |
|                     |                                                                                                                                              | gb AAN11303.1        | vitellogenin VTG [Panaeus semisulcatus]                                                                                                                                                                                                                                          | 31              | 9,9                                                                                                                                                                                                                                |          |      |        |

80 clones with "no match" BLAST results are not listed.

\* clones from the category "other" with E values between 1x10<sup>-2</sup> and 0,94
